# Stochastic character mapping of state-dependent diversification reveals the tempo of evolutionary decline in self-compatible Onagraceae lineages

WILLIAM A. FREYMAN<sup>1</sup> AND SEBASTIAN HÖHNA<sup>2</sup>

<sup>1</sup>*Department of Integrative Biology, University of California, Berkeley, CA, 94720, USA;*

<sup>2</sup>*Division of Evolutionary Biology, Ludwig-Maximilians-Universität München, Germany*

**Corresponding author:** William A. Freyman; E-mail: willfreyman@gmail.com

## 1 Abstract

2 A major goal of evolutionary biology is to identify key evolutionary transitions that correspond with shifts in  
3 speciation and extinction rates. Stochastic character mapping has become the primary method used to infer  
4 the timing, nature, and number of character state transitions along the branches of a phylogeny. The method  
5 is widely employed for standard substitution models of character evolution. However, current approaches  
6 cannot be used for models that specifically test the association of character state transitions with shifts in  
7 diversification rates such as state-dependent speciation and extinction (SSE) models. Here we introduce a  
8 new stochastic character mapping algorithm that overcomes these limitations, and apply it to study mating  
9 system evolution over a time-calibrated phylogeny of the plant family Onagraceae. Utilizing a hidden state  
10 SSE model we tested the association of the loss of self-incompatibility with shifts in diversification rates. We  
11 found that self-compatible lineages have higher extinction rates and lower net-diversification rates compared  
12 to self-incompatible lineages. Furthermore, these results provide empirical evidence for the “senescing”  
13 diversification rates predicted in highly selfing lineages: our mapped character histories show that the loss  
14 of self-incompatibility is followed by a short-term spike in speciation rates, which declines after a time lag of  
15 several million years resulting in negative net-diversification. Lineages that have long been self-compatible,  
16 such as *Fuchsia* and *Clarkia*, are in a previously unrecognized and ongoing evolutionary decline. Our results  
17 demonstrate that stochastic character mapping of SSE models is a powerful tool for examining the timing  
18 and nature of both character state transitions and shifts in diversification rates over the phylogeny.

## 19 1 Introduction

20 Evolutionary biologists have long sought to identify key evolutionary transitions that drive the diversification  
21 of life (Szathmary and Smith 1995; Sanderson and Donoghue 1996). One method frequently used to test

22 hypotheses about evolutionary transitions is stochastic character mapping on a phylogeny (Nielsen 2002;  
23 Huelsenbeck et al. 2003). While most ancestral state reconstruction methods estimate states only at the  
24 nodes of a phylogeny, stochastic character mapping explicitly infers the timing and nature of each evolu-  
25 tionary transition along the branches of a phylogeny. However, current approaches to stochastic character  
26 mapping have two major limitations: the commonly used rejection sampling approach proposed by Nielsen  
27 (2002) is inefficient for characters with large state spaces (Huelsenbeck et al. 2003; Hobolth and Stone 2009),  
28 and more importantly current methods only apply to models of character evolution that are finite state sub-  
29 stitution processes. While the first limitation has been partially overcome through uniformization techniques  
30 (Rodrigue et al. 2008; Irvahn and Minin 2014; Landis et al. 2018), a novel approach is needed for models  
31 with infinite state spaces, such as models that specifically test the association of character state transitions  
32 with shifts in diversification rates. These models describe the joint evolution of both a character and the  
33 phylogeny itself, and define a class of widely used models called state-dependent speciation and extinction  
34 models (SSE models; Maddison et al. 2007; FitzJohn et al. 2009; FitzJohn 2010, 2012; Goldberg and Igić  
35 2012; Magnuson-Ford and Otto 2012; Freyman and Höhna 2018).

36 In this work we introduce a method to sample character histories directly from their joint probability  
37 distribution, conditional on the observed tip data and the parameters of the model of character evolution.  
38 The method is applicable to standard finite state Markov processes of character evolution and also more  
39 complex models, such as SSE model, that are infinite state Markov processes. The method does not rely on  
40 rejection sampling and does not require complex data augmentation (Van Dyk and Meng 2001) schemes to  
41 handle unobserved speciation/extinction events. Our implementation directly simulates the number, type,  
42 and timing of diversification rate shifts and character state transitions on each branch of the phylogeny.  
43 Thus, when applying our method together with a Markov chain Monte Carlo (MCMC; Metropolis et al.  
44 1953; Hastings 1970) algorithm we can sample efficiently from the posterior distribution of both character  
45 state transitions and shifts in diversification rates over the phylogeny.

46 To illustrate the usefulness of our method to sample stochastic character maps from SSE models, we  
47 applied the method to examine the association of diversification rate shifts with mating system transitions  
48 in the plant family Onagraceae. The majority of flowering plants are hermaphrodites, and the loss of  
49 self-incompatibility (SI), the genetic system that encourages outcrossing and prevents self-fertilization, is a  
50 common evolutionary transition (Stebbins 1974; Grant 1981; Barrett 2002). Independent transitions to self-  
51 compatibility (SC) have occurred repeatedly across the angiosperm phylogeny (Igić et al. 2008) and within  
52 Onagraceae (Raven 1979). Despite the repeated loss of SI, outcrossing is widespread and prevalent in plants,  
53 an observation that led Stebbins to hypothesize that selfing was an evolutionary dead-end (Stebbins 1957).  
54 Stebbins proposed that over evolutionary time selfing lineages will have higher extinction rates due to reduced

55 genetic variation and an inability to adapt to changing conditions. However, Stebbins also speculated that  
56 selfing is maintained by providing a short-term advantage in the form of reproductive assurance. The ability  
57 of selfing lineages to self reproduce has long been understood to be potentially beneficial in droughts and  
58 other conditions where pollinators are rare (Darwin 1876), or after long distance dispersal when a single  
59 individual can establish a new population (Baker 1955).

60 Recent studies have reported higher net-diversification rates for SI lineages, supporting Stebbins' dead-  
61 end hypothesis (Ferrer and Good 2012; Goldberg et al. 2010; de Vos et al. 2014; Gamisch et al. 2015).  
62 Explicit phylogenetic tests for increased extinction rates in SC lineages have been performed in Solanaceae  
63 (Goldberg et al. 2010), Primulaceae (de Vos et al. 2014), and Orchidaceae (Gamisch et al. 2015), and all  
64 of these studies reported lower overall rates of net-diversification in SC lineages compared to SI lineages.  
65 In these studies the association of mating system transitions with shifts in extinction and speciation rates  
66 was tested using the Binary State Speciation and Extinction model (BiSSE; Maddison et al. 2007). More  
67 recently, BiSSE has been shown to be prone to falsely identifying a positive association when diversification  
68 rate shifts are associated with another character *not* included in the model (Maddison and FitzJohn 2015;  
69 Rabosky and Goldberg 2015). One approach to reduce the possibility of falsely associating a character with  
70 diversification rate heterogeneity is to incorporate a second, unobserved character into the model (i.e., a  
71 Hidden State Speciation and Extinction (HiSSE) model; Beaulieu and O'Meara 2016; Caetano et al. 2018).  
72 The changes in the unobserved character's state represent background diversification rate changes that are  
73 not correlated with the observed character. Our work here is the first to apply a HiSSE-type model to  
74 test Stebbins' dead-end hypothesis. We additionally use simulations and Bayes factors (Kass and Raftery  
75 1995) to evaluate the false positive error rate of our model. Most notably, we employ our novel stochastic  
76 character mapping method to reconstruct the timing of both diversification rate shifts and transitions in  
77 mating system over a fossil-calibrated phylogeny of Onagraceae. We test the hypothesis that SC lineages  
78 have higher extinction and speciation rates yet lower net-diversification rates compared to SI lineages, and  
79 investigate the short-term versus long-term macroevolutionary consequences of the loss of SI.

## 80 2 Methods

### 81 2.1 Stochastic Character Mapping Method

82 Figure 1 gives a side by side comparison of the standard stochastic character mapping algorithm as originally  
83 described by Nielsen (2002) and the approach introduced in this work. In standard stochastic character  
84 mapping the first step is to traverse the tree post-order (tip to root) calculating the conditional likelihood of

85 the character being in each state at each node using Felsenstein’s pruning algorithm (Figure 1a; Felsenstein  
86 1981). Transition probabilities are computed along each branch using matrix exponentiation. Ancestral  
87 states are then sampled at each node during a pre-order (root to tip) traversal (Figure 1b). Finally, character  
88 histories are repeatedly simulated using rejection sampling for each branch of the tree (Figure 1c).

89 A detailed pseudocode formulation of our new stochastic character mapping algorithm is provided in  
90 Algorithm 1. In this algorithm we begin similarly by traversing the tree post-order and calculating conditional  
91 likelihoods. However, instead of using matrix exponentiation we calculate the likelihood using a set of  
92 differential equations similar to Maddison et al. (2007). We numerically integrate these equations for every  
93 arbitrarily small time interval along each branch, however, unlike Maddison et al. (2007), we store a vector of  
94 conditional likelihoods for the character being in each state for every small time interval (Figure 1e). Letting  
95  $\mathcal{X}$  represent the observed tip data,  $\Psi$  an observed phylogeny, and  $\theta_q$  a particular set of character evolution  
96 model parameters, the likelihood at the root of the tree is then given by:

$$P(\mathcal{X}, \Psi | \theta_q) = \sum_i \pi_i D_{R,i}(t),$$

97 where  $\pi_i$  is the root frequency of state  $i$  and  $D_{R,i}(t)$  is the likelihood of the root node being in state  $i$   
98 conditional on having given rise to the observed tree  $\Psi$  and the observed tip data  $\mathcal{X}$  (Freyman and Höhna  
99 2018).

100 We then sample a complete character history during a pre-order tree traversal. First, the root state is  
101 drawn from probabilities proportional to the marginal likelihood of each state at the root ( $p_i = \frac{\pi_i D_{R,i}(t)}{\sum_i \pi_i D_{R,i}(t)}$ ).  
102 Then, states are drawn for each small time interval moving towards the tip of the tree conditioned on the  
103 state of the previous small time interval (Figure 1f). To compute the probability of a state at the end of  
104 each small time interval, we integrate numerically over a set of differential equations during this root-to-tip  
105 tree traversal, see Figure 1f. This integration, however, is performed in forward-time, thus a different and  
106 new set of differential equations must be used (defined below). With this approach we can directly sample  
107 character histories from a SSE process in forward-time, resulting in a complete stochastic character map  
108 sample without the need for rejection sampling or uniformization, see Figure 1.

## 109 2.2 Derivation of our differential equations

110 The two functions we integrate numerically are  $D_{N,i}(t)$ , which is defined as the probability that a lineage in  
111 state  $i$  at time  $t$  evolves into the observed clade  $N$ , and  $E_i(t)$  which is the probability that a lineage in state  
112  $i$  at time  $t$  goes extinct before the present, or is not sampled at the present.

113 In the following section we will derive the differential equations for our algorithm to compute the prob-

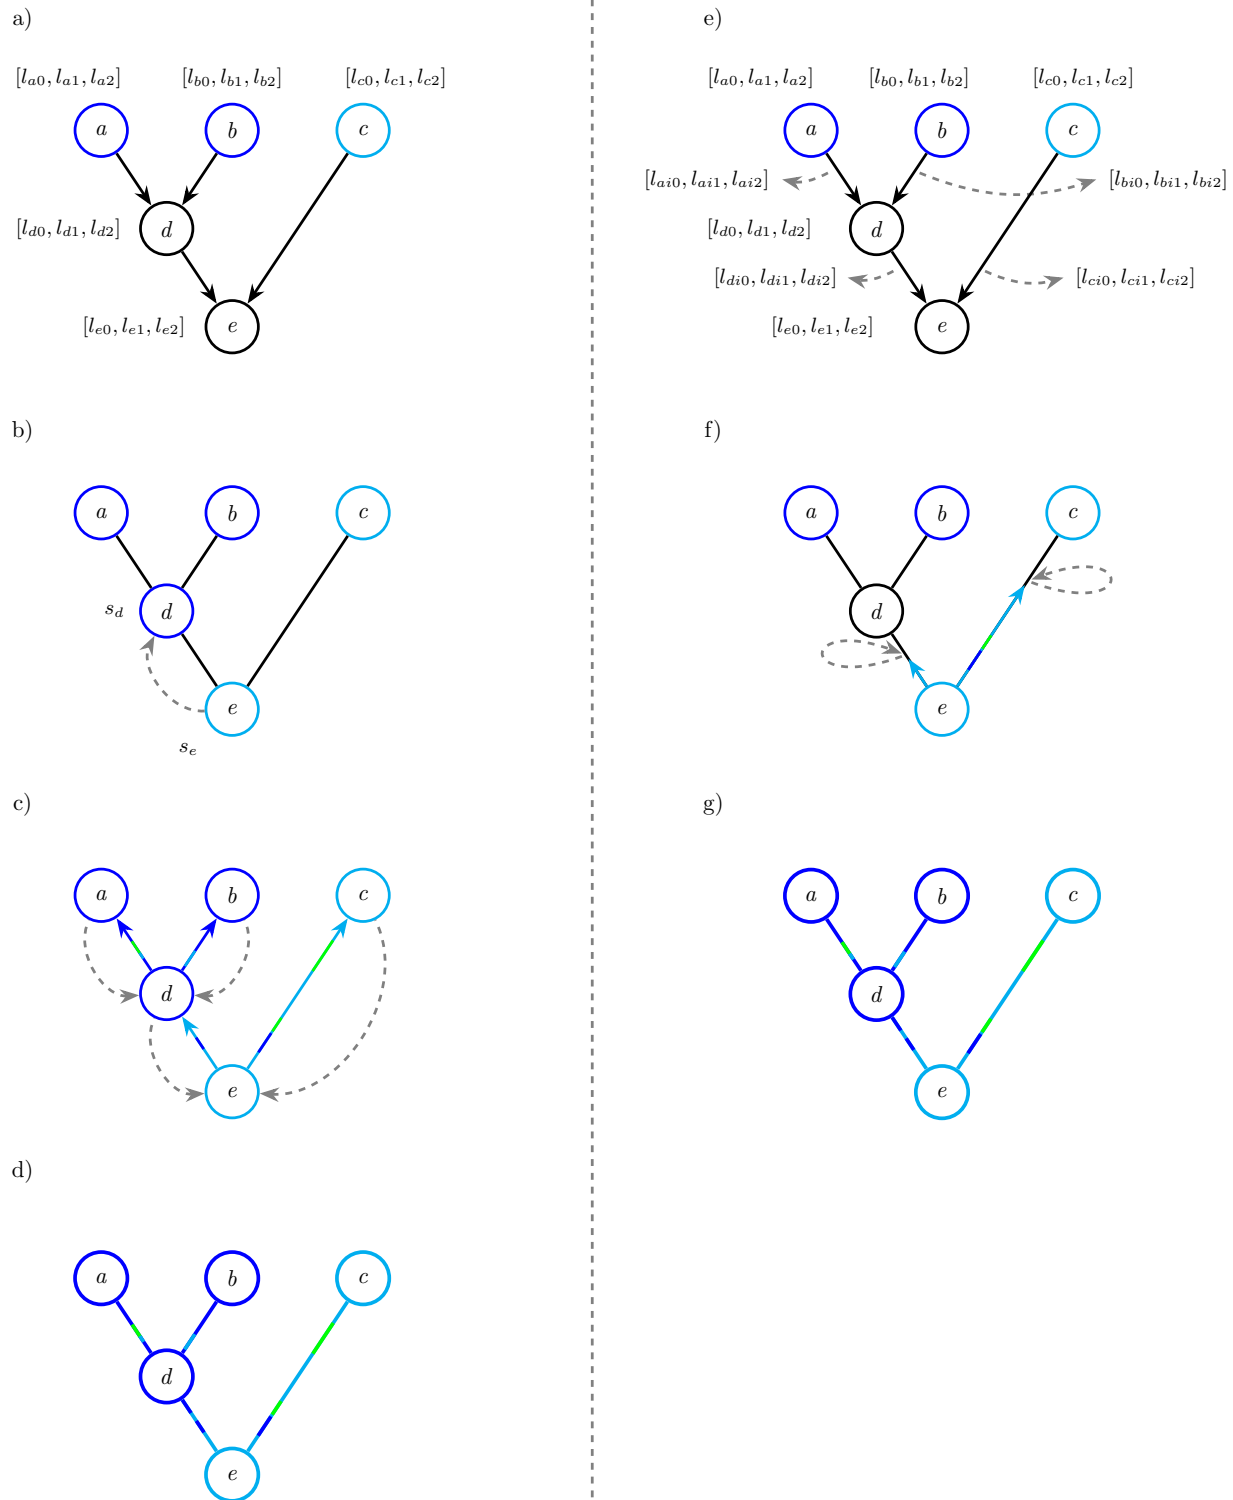

**Figure 1: Schematic and comparison of stochastic character mapping methods.** On the left (a, b, c, d) is an illustration of the standard stochastic character mapping algorithm as originally described by Nielsen (2002). On the right (e, f, g) is the approach introduced in this work. The first step in standard stochastic character mapping is (a) traversing the tree post-order (tip to root) calculating conditional likelihoods for each node. Next, ancestral states are sampled at each node during a pre-order (root to tip) traversal (b). Branch by branch, character histories are then repeatedly simulated using rejection sampling (c), resulting in a full character history (d). The first step in the stochastic character mapping method introduced in this work is (e) traversing the tree post-order calculating conditional likelihoods for every arbitrarily small time interval along each branch and at nodes. Here the vector  $[l_{n0}, l_{n1}, l_{n2}]$  represents the conditional likelihoods of the process at node  $n$  in states 0, 1, and 2, and the vector  $[l_{ni0}, l_{ni1}, l_{ni2}]$  represents the conditional likelihoods of the process in the small time interval  $i$  along the branch leading to node  $n$ . Next, during a pre-order traversal ancestral states are sampled for each time interval (f). The grey dashed loop represents the forward-time equations (Equations 4 and 6) conditioning on a state sampled during each small time interval. The result is a full character history (g) without the need for a rejection sampling step. See the main text for more details.

**Algorithm 1** Stochastic character mapping algorithm.  $D_{Ni}(t)$  is the probability that a lineage in state  $i$  at time  $t$  evolves into the observed clade  $N$ .  $E_i(t)$  is the probability that a lineage in state  $i$  at time  $t$  goes extinct or is not sampled before the present.

---

1: **Inputs:**  
 $\mathcal{X}$ : the vector of observed tip states.  
 $t_r$ : the starting time of the process.  
 $\pi$ : the vector of root state frequencies.  
 $\lambda$ : the vector of speciation rates.  
 $\mu$ : the vector of extinction rates.  
 $\rho$ : the probability of sampling a lineage in the present.  
 $Q$ : The matrix of transition rates between states.

2: **Initialize:**  
 $t \leftarrow 0$  // start at the present  
 $E_i(t=0) \leftarrow 1 - \rho$  // extinction probability at present time  
**if**  $i = \mathcal{X}_{\text{observed}}$  **then**  
 $D_{N,i}(t=0) \leftarrow \rho$  // probability of observed character  
**else**  
 $D_{N,i}(t=0) \leftarrow 0$

3: **while**  $t \leq t_r$  **do** // post-order tree traversal  
4: **if** node  $L$  is reached **then**  
5:  $D_{L,i}(t) \leftarrow \sum_j \sum_k \lambda_{ijk} D_{M,j}(t) D_{N,k}(t)$  // combine descendant probabilities  
6: **else**  
7:  $L_{N,i}(t) \leftarrow D_{N,i}(t)$  // store the conditional likelihoods for this time interval  
8:  $E_i(t + \Delta t) \leftarrow E_i(t) +$  // compute conditional likelihoods for next time interval  

$$\left[ \mu_i - \left( \sum_j \sum_k \lambda_{ijk} + \sum_{j \neq i} Q_{ij} + \mu_i \right) E_i(t) \right. \\ \left. + \sum_{j \neq i} Q_{ij} E_j(t) + \sum_j \sum_k \lambda_{ijk} E_j(t) E_k(t) \right] \Delta t$$
 // backward-time Equation (1)  
9:  $D_{N,i}(t + \Delta t) \leftarrow D_{N,i}(t) +$   

$$\left[ - \left( \sum_j \sum_k \lambda_{ijk} + \sum_{j \neq i} Q_{ij} + \mu_i \right) D_{N,i}(t) + \sum_{j \neq i} Q_{ij} D_{N,j}(t) \right. \\ \left. + \sum_j \sum_k \lambda_{ijk} \left( D_{N,k}(t) E_j(t) + D_{N,j}(t) E_k(t) \right) \right] \Delta t$$
 // backward-time Equation (2)  
10:  $t \leftarrow t + \Delta t$  // increment the current  $t$   
11: **end if**  
12: **end while**  
13: **while**  $t \geq 0$  **do** // pre-order tree traversal  
14: **if**  $t = t_r$  **then**  
15:  $s_t \sim \text{Multinomial}(n = 1, D_N(t_r) \times \pi)$  // draw character state at the root  
16: **else**  
17:  $s_t \sim \text{Multinomial}(n = 1, D_N(t) \times L_N(t))$  // draw character state for time  $t$   
18: **end if**  
19:  $D_{N,s_t} \leftarrow 1$  // condition on the sampled character state  
20:  $D_{N,i \neq s_t} \leftarrow 0$   
21:  $E_i(t - \Delta t) \leftarrow E_i(t) -$   

$$\left[ \mu_i - \left( \sum_j \sum_k \lambda_{ijk} + \sum_{j \neq i} Q_{ij} + \mu_i \right) E_i(t) \right. \\ \left. + \sum_{j \neq i} Q_{ij} E_j(t) + \sum_j \sum_k \lambda_{ijk} E_j(t) E_k(t) \right] \Delta t$$
 // forward-time Equation (4)  
22:  $D_{N,i}(t - \Delta t) \leftarrow D_{N,i}(t) +$   

$$\left[ - \left( \sum_j \sum_k \lambda_{ijk} + \sum_{j \neq i} Q_{ij} + \mu_i \right) D_{N,i}(t) \right. \\ \left. + \sum_{j \neq i} Q_{ji} D_{N,j}(t) + D_{N,j}(t) E_k(t) \left( \sum_j \sum_k \lambda_{jik} + \sum_j \sum_k \lambda_{jki} \right) \right] \Delta t$$
 // forward-time Equation (6)  
23:  $t \leftarrow t - \Delta t$  // decrement the current  $t$   
24: **end while**  
25: **return** vector of all sampled character states  $s$

---

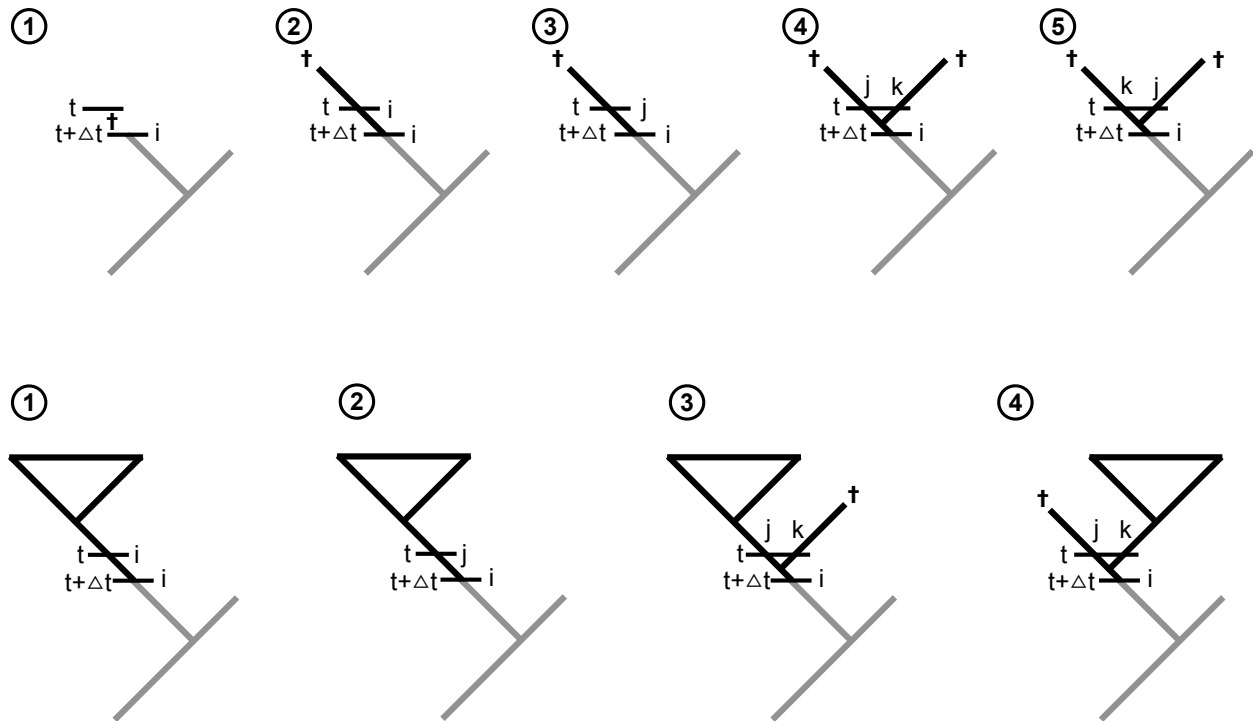

**Figure 2: Alternative scenarios of events in a small time interval  $\Delta t$  looking backwards in time.** The top row shows the different scenarios for a lineage that goes extinct before the present. Case 1: The lineage goes extinct in the time interval  $\Delta t$ . Case 2: There is no event in the time interval  $\Delta t$  and the lineage goes extinct before the present. Case 3: The lineage undergoes a state-shift event to state  $j$  in the time interval  $\Delta t$  and the lineage goes extinct before the present. Case 4: The lineage speciates and leaves a left daughter lineage in state  $j$  and a right daughter lineage in state  $k$  and both daughter lineages go extinct before the present. Case 5: The lineage speciates and leaves a left daughter lineage in state  $k$  and a right daughter lineage in state  $j$  and both daughter lineages go extinct before the present. The bottom row shows the different scenarios for an observed lineage. Case 1: There is no event in the time interval  $\Delta t$ . Case 2: The lineage undergoes a state-shift event to state  $j$  in the time interval  $\Delta t$ . Case 3: The lineage speciates and leaves a left daughter lineage in state  $j$  and a right daughter lineage in state  $k$  and only the left daughter lineage survives. Case 4: The lineage speciates and leaves a left daughter lineage in state  $j$  and a right daughter lineage in state  $k$  and only the right daughter lineage survives.

114 ability of the observed lineages and the extinction probabilities both backwards and forwards in time. We  
 115 additionally show how the forward-time equations must be modified to handle non-reversible models of  
 116 character evolution when sampling ancestral states or stochastic character maps.

### 117 2.2.1 Differential equations backwards in time

118 The original derivation of the differential equations for the state-dependent speciation and extinction (SSE)  
 119 process are defined backward in time (Maddison et al. 2007). Here we use a generalization of the SSE process  
 120 to allow for cladogenetic events where daughter lineages may inherit different states, as derived by Goldberg  
 121 and Igić (2012), see also Magnuson-Ford and Otto (2012) and Ng and Smith (2014). We repeat this known  
 122 derivation of the backwards process to show the similarities to our forward in time derivation. We present  
 123 an overview of the possible scenarios of what can happen in a small time interval  $\delta t$  in Figure 2. We need to  
 124 consider all these scenarios in our differential equations.

First, let us start with the computation of the extinction probability. That is, we want to compute the probability of a lineage going extinct at time  $t + \Delta t$ , denoted by  $E(t + \Delta t)$ , before the present time  $t = 0$ . We assume that we know the extinction probability of a lineage at time  $t$ , denoted by  $E(t)$ , which is provided by our initial condition that  $E(t = 0) = 0$  because the probability of a lineage alive at the present cannot go extinct before the present, or  $E(t = 0) = 1 - \rho$  in the case of incomplete taxon sampling. We have five different cases (top row in Figure 2): (1) the lineage goes extinct within the interval  $\Delta t$ ; (2) nothing happens in the interval  $\Delta t$  but the lineage eventually goes extinct before the present; (3) a state-change to state  $j$  occurs and the lineage now in state  $j$  goes extinct before the present; (4) the lineage speciates, giving birth to a left daughter lineage in state  $j$  and a right daughter lineage in state  $k$  and both lineages eventually go extinct before the present, or; (5) the lineage speciates, giving birth to a left daughter lineage in state  $k$  and a right daughter lineage in state  $j$  and both lineages eventually go extinct before the present. With this description of all possible scenarios we can derive the differential equation.

$$\begin{aligned}
 E_i(t + \Delta t) = E_i(t) + & \tag{1} \\
 & \left[ \begin{aligned} & \mu_i & \text{Case (1)} \\ & - \left( \sum_j \sum_k \lambda_{ijk} + \sum_{j \neq i} Q_{ij} + \mu_i \right) E_i(t) & \text{Case (2)} \\ & + \sum_{j \neq i} Q_{ij} E_j(t) & \text{Case (3)} \\ & + \sum_j \sum_k \lambda_{ijk} E_j(t) E_k(t) \end{aligned} \right] \Delta t & \text{Case (4) and (5)}
 \end{aligned}$$

Similarly, we can consider all possible scenarios for an observed lineage. We have four different cases (bottom row in Figure 2): (1) nothing happens in the interval  $\Delta t$ ; (2) a state-change to state  $j$  occurs; (3) the lineage speciates, giving birth to a left daughter lineage in state  $j$  and a right daughter lineage in state  $k$  and only the left daughter lineage survives until the present, or; (4) the lineage speciates, giving birth to a left daughter lineage in state  $j$  and a right daughter lineage in state  $k$  and only the right daughter lineage survives until the present. Again, these scenarios are sufficient to derive the differential equation for the probability of an



observed lineage, denoted  $D(t)$ .

$$\begin{aligned}
 D_{N,i}(t + \Delta t) = D_{N,i}(t) + & \tag{2} \\
 & \left[ - \left( \sum_j \sum_k \lambda_{ijk} + \sum_{j \neq i} Q_{ij} + \mu_i \right) D_{N,i}(t) \tag{Case (1)} \right. \\
 & + \sum_{j \neq i} Q_{ij} D_{N,j}(t) \tag{Case (2)} \\
 & \left. + \sum_j \sum_k \lambda_{ijk} \left( D_{N,k}(t) E_j(t) + D_{N,j}(t) E_k(t) \right) \right] \Delta t \tag{Case (3) and (4)}
 \end{aligned}$$

### 125 2.2.2 Differential equations forward in time

Next, we want to compute the probability of extinction and the probability of an observed lineage forward in time. For the probability of extinction this is, in principle, almost identical to the backward in time equations. However, now we assume that we know  $E(t)$  and want to compute  $E(t - \Delta t)$ . We already computed  $E(t_{root})$  and  $D(t_{root})$  in our post-order tree traversal (from the tips to root). We use  $E(t_{root})$  as the initial conditions to approximate  $E(t - \Delta t)$ . Again, we have the same five different cases (top row in Figure 2): (1) the lineage goes extinct within the interval  $\Delta t$ ; (2) nothing happens in the interval  $\Delta t$  but the lineage eventually goes extinct before the present; (3) a state-change to state  $j$  occurs and the lineage now in state  $j$  goes extinct before the present; (4) the lineage speciates, giving birth to a left daughter lineage in state  $j$  and a right daughter lineage in state  $k$  and both lineages eventually go extinct before the present, or; (5) the lineage speciates, giving birth to a left daughter lineage in state  $k$  and a right daughter lineage in state  $j$  and both lineages eventually go extinct before the present. However, these are the events that can happen in the future and we included the probabilities of these events already in  $E(t)$ . Thus, we need to subtract instead of adding all possible scenarios that lead to the extinction of the lineage in the time interval

$\Delta t$  from  $E(t)$  to obtain  $E(t - \Delta t)$ . This gives us the differential equation for the extinction probability as

$$\begin{aligned}
 E_i(t - \Delta t) = E_i(t) - & \tag{3} \\
 & \left[ \begin{aligned} & \mu_i && \text{Case (1)} \\ & - \left( \sum_j \sum_k \lambda_{ijk} + \sum_{j \neq i} Q_{ij} + \mu_i \right) E_i(t) && \text{Case (2)} \\ & + \sum_{j \neq i} Q_{ij} E_j(t - \Delta t) && \text{Case (3)} \\ & + \sum_j \sum_k \lambda_{ijk} E_j(t - \Delta t) E_k(t - \Delta t) \end{aligned} \right] \Delta t && \text{Case (4) and (5)}
 \end{aligned}$$

Unfortunately, we cannot solve Equation (3) directly because we do not know  $E_j(t - \Delta t)$  and  $E_k(t - \Delta t)$ . Instead, we will approximate Equation (3) by using  $E_j(t)$  instead of  $E_j(t - \Delta t)$ , and  $E_k(t)$  instead of  $E_k(t - \Delta t)$ , respectively. Our approximation yields the new differential equation of the extinction probability by

$$\begin{aligned}
 E_i(t - \Delta t) \approx E_i(t) - & \tag{4} \\
 & \left[ \begin{aligned} & \mu_i && \text{Case (1)} \\ & - \left( \sum_j \sum_k \lambda_{ijk} + \sum_{j \neq i} Q_{ij} + \mu_i \right) E_i(t) && \text{Case (2)} \\ & + \sum_{j \neq i} Q_{ij} E_j(t) && \text{Case (3)} \\ & + \sum_j \sum_k \lambda_{ijk} E_j(t) E_k(t) \end{aligned} \right] \Delta t && \text{Case (4) and (5)}
 \end{aligned}$$

The derivation of the probability of an observed lineage in forward time is slightly different. When sampling a character history from the process we must compute  $D(t - \Delta t)$  conditioned upon the character state sampled at time  $t$ . This does not effect the probability of a lineage going extinct before the present, so we can use  $E(t_{root})$  as the initial conditions to approximate  $E(t - \Delta t)$ . The initial conditions for the probability of an observed lineage, on the other hand, must account for the sampled character state. For example, if we sample the state  $a$  at time  $t$  our initial conditions to compute  $D(t - \Delta t)$  must be  $D_a(t) = 1.0$  and  $D_b(t) = 0.0$  for all other character states  $b$ . Additionally, we must consider the process in forward time with all possible scenarios instead of backwards in time and subtracting the possible scenarios. We have four different cases that are similar to the cases for the backward in time computation (bottom row in Figure 2),

however here the character state transitions are reversed since we are looking forward in time: (1) nothing happens in the interval  $\Delta t$ ; (2) with probability  $D_{N,j}(t)$  the lineage was in state  $j$  and then a state-change to state  $i$  occurs; (3) with probability  $D_{N,j}(t)$  the lineage was in state  $j$  and then speciates, giving birth to a left daughter lineage in state  $i$  and a right daughter lineage in state  $k$  and only the left daughter lineage survives until the present (the probability of extinction of the right daughter lineage is given by  $E_k(t - \Delta t)$ ), or; (4) with probability  $D_{N,j}(t)$  the lineage was in state  $j$  and then speciates, giving birth to a left daughter lineage in state  $k$  and a right daughter lineage in state  $i$  and only the right daughter lineage survives until the present (the probability of extinction of the left daughter lineage is given by  $E_k(t - \Delta t)$ ). From these four scenarios we derive the differential equation.

$$\begin{aligned}
 D_{N,i}(t - \Delta t) = D_{N,i}(t) + & \tag{5} \\
 & \left[ - \left( \sum_j \sum_k \lambda_{ijk} + \sum_{j \neq i} Q_{ij} + \mu_i \right) D_{N,i}(t) \tag{Case (1)} \right. \\
 & + \sum_{j \neq i} Q_{ji} D_{N,j}(t) \tag{Case (2)} \\
 & \left. + D_{N,j}(t) E_k(t - \Delta t) \left( \sum_j \sum_k \lambda_{jik} + \sum_j \sum_k \lambda_{jki} \right) \right] \Delta t \tag{Case (3) and (4)}
 \end{aligned}$$

As before, we cannot solve Equation (5) directly because we do not know  $E_k(t - \Delta t)$ . Thus, we use the same approximation as before and substitute  $E_k(t)$  for  $E_k(t - \Delta t)$ . This substitution gives our approximated differential equation.

$$\begin{aligned}
 D_{N,i}(t - \Delta t) \approx D_{N,i}(t) + & \tag{6} \\
 & \left[ - \left( \sum_j \sum_k \lambda_{ijk} + \sum_{j \neq i} Q_{ij} + \mu_i \right) D_{N,i}(t) \tag{Case (1)} \right. \\
 & + \sum_{j \neq i} Q_{ji} D_{N,j}(t) \tag{Case (2)} \\
 & \left. + D_{N,j}(t) E_k(t) \left( \sum_j \sum_k \lambda_{jik} + \sum_j \sum_k \lambda_{jki} \right) \right] \Delta t \tag{Case (3) and (4)}
 \end{aligned}$$

126 To sample character histories from an SSE process in forward-time during Algorithm (1) we calculate  
 127  $E(t - \Delta t)$  using the approximation given by Equation (4) and  $D(t - \Delta t)$  using Equation (6).

### 128 2.3 Correctness of the forward time equations

### 129 2.3.1 Validation of the forward time extinction probabilities

130 For the purpose of demonstrating our forward time equations, we will use a non-symmetrical BiSSE model  
131 with states 0 and 1 which have the speciation rates  $\lambda_0 = 1$  and  $\lambda_1 = 2$ , the extinction rates  $\mu_0 = 0.5$  and  
132  $\mu_1 = 1.5$ , and the transition rates  $Q_{01} = 0.2$  and  $Q_{10} = 2.0$ . For simplicity we assume that there are no state  
133 changes at speciation events. We will first show that the approximations given by Equation (4) actually  
134 converge to the true probability of extinction if the time interval  $\Delta t$  is very small (goes to zero). Note  
135 that we cannot show the same behavior for the forward in time probabilities of the observed lineage,  $D(t)$ ,  
136 because when conditioning on a sampled character state the forward in time probabilities will be different  
137 than the backward in time probabilities. For these probabilities we provide a different type of validation in  
138 Section 2.3.2.

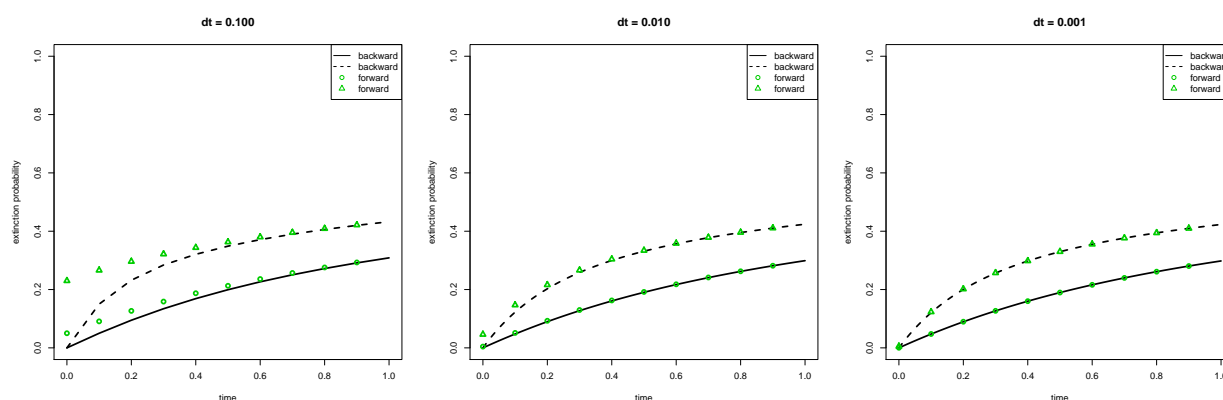

**Figure 3: The probability of extinction computed backward and forward in time.** Here we compute the extinction probabilities  $E_0(t)$  and  $E_1(t)$  for a BiSSE model backward and forward in time. Details about the parameters of the BiSSE model are given in the text. We varied the step-size  $\Delta t$  for the numerical integration between 0.1, 0.01, and 0.001 to show that both computations give the same probabilities once  $\Delta t$  is small enough.

139 We start by computing the probability of extinction and the probability of an observed lineage backward  
140 in time for a total time interval of 1.0. We initialize the computation with  $E_i(t = 0) = 0$  and then compute  
141  $E_0(t)$  and  $E_1(t)$  backward in time. Then, we use the computed values of  $E_i(t = 1)$  as the initial values for  
142 our forward in time computation. If our approximation is correct, then we should get identical values for  
143 the extinction probabilities  $E_i(t)$  for any value of  $t$ .

144 Figure 3 shows our computation using three different values for  $\Delta t$ : 0.1, 0.01 and 0.001. We observe  
145 that our approximation of the forward in time computation of the probabilities converges to the backward  
146 in time computation when  $\Delta t \leq 0.001$ , which confirms our expectation. An explanation for the convergence  
147 is that  $E_0(t)$  will be approximately equal to  $E_0(t - \Delta t)$ , (and  $E_1(t)$  to  $E_1(t - \Delta t)$ ) the smaller  $\Delta t$  becomes.  
148 In our actual implementation in `RevBayes` we use an initial step-size of  $\Delta t = 10^{-7}$  but apply an adaptive  
149 numerical integration routine to minimize the error in the integrated function.

### 150 2.3.2 Validation of the forward time equations against diversitree

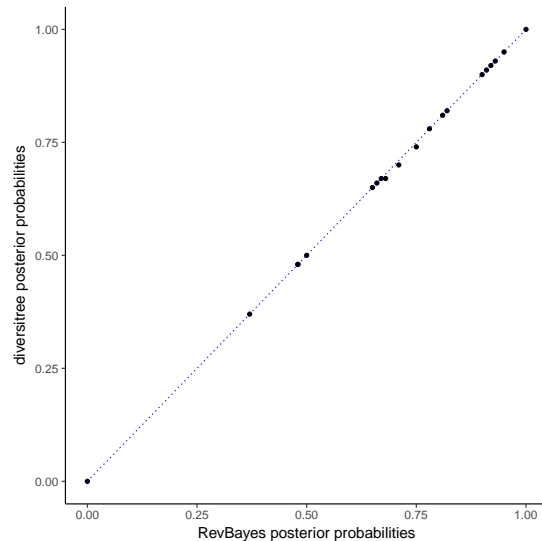

**Figure 4: Comparing marginal posterior ancestral state estimates from diversitree to those calculated in RevBayes.** Each point represents the posterior probability of a given node having the ancestral state 0. On the y-axis are the posterior probabilities as analytically calculated by `diversitree`. On the x-axis are the posterior probabilities as calculated by `RevBayes` using Algorithm (1). Our approximation given in Equation (6) yields highly similar posterior probabilities of the ancestral states as `diversitree`. Scripts to repeat this test with various parameter settings are provided in [https://github.com/wf8/anc\\_state\\_validation](https://github.com/wf8/anc_state_validation).

151 Second, we validate our method of sampling character histories from an SSE process in forward-time  
152 by testing it against the analytical marginal ancestral state estimation implemented in the R package  
153 `diversitree` (FitzJohn 2012). Our method as implemented in `RevBayes` works for sampling both ances-  
154 tral states and stochastic character maps, however `diversitree` can not sample stochastic character maps.  
155 Thus we limit our comparison to ancestral states estimated at the nodes of a phylogeny. Though our method  
156 works for all SSE models nested within ClaSSE, ancestral state estimation for ClaSSE is not implemented in  
157 `diversitree`, so we further limit our comparison to ancestral state estimates for a BiSSE model. Note that  
158 as implemented in `RevBayes` the BiSSE, ClaSSE, MuSSE (FitzJohn 2012), HiSSE (Beaulieu and O'Meara  
159 2016), ChromoSSE (Freyman and Höhna 2018), and GeoSSE (Goldberg et al. 2011) models use the same  
160 C++ classes and algorithms for parameter and ancestral state estimation, so validating under BiSSE should  
161 provide confidence in estimates made by `RevBayes` for all these SSE models.

162 Our method samples character histories from SSE models from their joint distribution conditioned on the  
163 tip states and the model parameters during MCMC. In contrast, `diversitree` computes marginal ancestral  
164 states analytically. Thus to directly compare results from these two approaches we calculated the marginal  
165 posterior probability of each node being in each state from a set of 10000 samples drawn by our Monte Carlo  
166 method. Figure 4 compares these estimates under a non-reversible BiSSE model where the tree and tip data

167 were simulated in `diversitree` with the following parameters:  $\lambda_0 = 0.2, \lambda_1 = 0.4, \mu_0 = 0.01, \mu_1 = 0.1$ , and  
168  $q_{01} = 0.1, q_{10} = 0.4$ . Figure 4 shows that using the approximation of  $E(t - \Delta t)$  given by Equation (4) and  
169 the approximation to compute  $D(t - \Delta t)$  in Equation (6) during Algorithm (1) results in marginal posterior  
170 estimates for the ancestral states that are nearly identical (up to some expected numerical and sampling  
171 errors) to those calculated analytically by `diversitree`. Scripts to perform this test with various parameter  
172 settings are provided in [https://github.com/wf8/anc\\_state\\_validation](https://github.com/wf8/anc_state_validation).

## 173 2.4 Implementation, MCMC Sampling and Computation Efficiency

174 The stochastic character mapping method described here is implemented in C++ in the software `RevBayes`  
175 (Höhna et al. 2014, 2016). The `RevGadgets` R package (available at <https://github.com/revbayes/RevGadgets>)  
176 can be used to generate plots from `RevBayes` output. Scripts to run all `RevBayes` analyses  
177 presented here can be found in the repository at <https://github.com/wf8/onagraceae>.

178 Our method approximates the posterior distribution of the timing and nature of all character transitions  
179 and diversification rate shifts by sampling a large number of stochastically mapped character histories using  
180 MCMC. Uncertainty in the phylogeny and other parameters is incorporated by integrating over all possible  
181 phylogenetic trees and other parameters jointly. From these sampled character histories the maximum a  
182 posteriori character history can be summarized in a number of ways. The approach presented here is to  
183 calculate the marginal probabilities of character states for every small time interval along each branch,  
184 however one could also calculate the joint posterior probability of an entire character history.

185 During Algorithm (1) the rate-limiting step is writing conditional likelihood vectors for every small time  
186 interval along every branch on the tree, particularly when the state space of the model is large. The time  
187 required is of order  $O(n \times m \times r)$ , where  $n$  is the number of taxa in the tree,  $m$  is the number of character  
188 states, and  $r$  is the number of time intervals. This is reduced by only storing conditional likelihood vectors for  
189 all time intervals during the MCMC iterations that are sampled. During unsampled (*i.e.*, thinned) MCMC  
190 iterations the likelihood is calculated in the standard way storing conditional likelihood vectors only at the  
191 nodes, thus the use of the stochastic mapping algorithm has little impact on the overall computation time.

## 192 2.5 Onagraceae Phylogenetic Analyses

193 DNA sequences for Onagraceae and Lythraceae were mined from GenBank using `SUMAC` (Freyman 2015).  
194 Lythraceae was selected as an outgroup since previous molecular phylogenetic analyses place it sister to  
195 Onagraceae (Sytsma et al. 2004). In total 8 gene regions were used (7 chloroplast loci plus the nuclear  
196 ribosomal internal transcribed spacer region) representing a total of 340 taxa (292 Onagraceae taxa and

197 48 Lythraceae taxa). Information about the alignments and GenBank accessions used can be found in  
198 the Supporting Information Section S1.1. Phylogeny and divergence times were inferred using RevBayes  
199 (Höhna et al. 2016). Node ages were calibrated using five fossil calibrations and one secondary calibration.  
200 Details regarding the calibrations, the models of molecular evolution, and MCMC analyses are given in the  
201 Supporting Information Section S1.1.

## 202 **2.6 Analyses of Mating System Evolution**

203 The mating systems of Onagraceae species were scored as either SC or SI following Wagner et al. (2007).  
204 Most of the SC/SI assignments in Wagner et al. (2007) come from detailed family-level surveys such as  
205 Raven (1979), in which the outcrossing/selfing modes of 283 Onagraceae species were examined, and Heslop-  
206 Harrison (1990), in which compatibility tests of 48 Onagraceae species were performed. Other SC/SI assign-  
207 ments come from the many genus- and section-level studies cited in citetwagner2007revised such as Lewis  
208 and Lewis (1955), Plitmann et al. (1973), and Seavey et al. (1977).

209 For the analysis of mating system evolution, all outgroup (Lythraceae) lineages were pruned off our  
210 phylogeny, leaving 292 Onagraceae species. The species sampling fraction of extant Onagraceae species was  
211 thus  $\rho = 292/650 = 0.45$ , which is the number of species sampled divided by the approximate total number  
212 of Onagraceae species reported in Wagner et al. (2007). We use this sampling fraction of extant Onagraceae  
213 as the uniform taxon sampling probability  $\rho$ , assuming that missing species are uniformly distributed over  
214 the phylogeny (Nee et al. 1994; Yang and Rannala 1997; Höhna et al. 2011; Höhna 2014). We assumed there  
215 was no state-dependent sampling bias since we lacked complete SC/SI assignments for all Onagraceae taxa  
216 that would indicate such a bias. Finally, we accounted for uncertainty in the phylogeny and divergence times  
217 by sampling 200 trees from the posterior distribution of trees.

### 218 **2.6.1 HiSSE Model**

219 To test whether diversification rate heterogeneity is associated with shifts in mating system or changes in  
220 other unmeasured traits, we used a model with 4 states that describes the joint evolution of mating system  
221 as well as an unobserved character with hidden states  $a$  and  $b$  (Figure 5). For each of the 4 states we  
222 estimated speciation ( $\lambda$ ) and extinction ( $\mu$ ) rates. For details on priors used and the MCMC analyses see  
223 the Supporting Information Section S2.1.

224 The system of SI found in Onagraceae is S-RNase-based gametophytic SI (Raven 1979; Franklin et al.  
225 1995; Igc et al. 2008). This system of SI evolved once in the common ancestor of the Asteridae and  
226 Rosidae (Steinbachs and Holsinger 2002; Igc et al. 2008; Vieira et al. 2008; Niu et al. 2017; Ramanauskas

227 and Igić 2017), the clade that contains Onagraceae. Raven (1979) writes the system of SI in Onagraceae “is  
228 gametophytic, and involves a series of S-alleles, with inhibition of pollen-tube growth normally in the surface  
229 layers of the stigma.” Furthermore, Raven writes that SI “seems to have been characteristic of the original  
230 common ancestor of Onagraceae, judged by the occurrence of self-incompatibility in four of the seven tribes  
231 of the family. There is no evidence for the evolution of self-incompatibility within the family once it has been  
232 lost.” Following Raven (1979), we used an irreversible model that only allowed transitions from SI to SC.  
233 However, to test the assumption of irreversibility on our results, we additionally used a model that allowed  
234 for the possibility of secondary gains of SI by permitting both transitions from SI to SC and transitions from  
235 SC to SI (see Supporting Information Section S2.3).

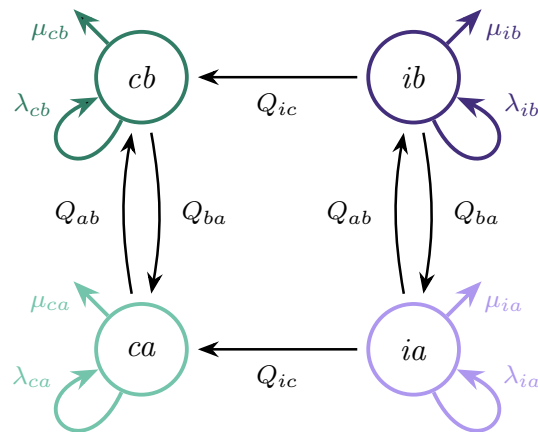

**Figure 5: SSE model depicting states and rate parameters used to infer mating system evolution.** The states are labeled  $ca$ ,  $cb$ ,  $ia$ , and  $ib$ , representing self-compatible hidden state  $a$ , self-compatible hidden state  $b$ , self-incompatible hidden state  $a$ , and self-incompatible hidden state  $b$ , respectively. Independent extinction  $\mu$  and speciation  $\lambda$  rates were estimated for each of the 4 states, as well as the rate of transitioning from self-incompatible to self-compatible  $Q_{ic}$  and the rates of transitioning between the hidden states  $Q_{ab}$  and  $Q_{ba}$ .

## 236 2.6.2 Model Comparisons, Incomplete Sampling, and Error Rates

237 To test whether diversification-rate heterogeneity was *not* associated with shifts in mating system, we calcu-  
238 lated a Bayes factor (Kass and Raftery 1995) to compare the mating system-dependent diversification model  
239 described above with a mating system-independent diversification model. The independent model had 4  
240 states and the same parameters as the dependent model, except that the speciation and extinction rates  
241 were fixed so they only varied between the hidden states  $a$  and  $b$ . Hence,  $\lambda_{ca}$  was fixed to equal  $\lambda_{ia}$ ,  $\lambda_{cb}$  was  
242 fixed to  $\lambda_{ib}$ ,  $\mu_{ca}$  was fixed to  $\mu_{ia}$ , and  $\mu_{cb}$  was fixed to  $\mu_{ib}$ .

243 To evaluate the false positive error rate and the effect of incomplete taxon sampling, we performed a  
244 series of simulations that tested the power of our models to reject false associations between shifts in mating



245 system and diversification rate shifts. Trees were simulated under a BiSSE model, and then diversification  
246 *independent* binary characters representing mating system were simulated over the trees. To test the effect  
247 of missing data on our power to detect state-dependent diversification, the simulated datasets were pruned  
248 to have the same proportion of taxon sampling as our empirical Onagraceae dataset (45%; see Supporting  
249 Information). For each simulation replicate, Bayes factors were calculated to compare the fit of the mating  
250 system-dependent diversification model and mating system-independent diversification model. Details on  
251 the simulations are provided in the Supporting Information Section S3.1.

252 All Bayes factors were calculated using the stepping stone method (Xie et al. 2010; Höhna et al. 2017), as  
253 implemented in RevBayes. Marginal likelihood estimates were run for 50 path steps and 19000 generations  
254 within each step. The Bayes factor was then calculated as twice the difference in the natural log marginal  
255 likelihoods (Kass and Raftery 1995).

## 256 3 Results

### 257 3.1 Onagraceae Phylogeny

258 In our estimated phylogeny, all currently recognized Onagraceae genera (Wagner et al. 2007) were strongly  
259 supported to be monophyletic with posterior probabilities  $> 0.98$ . The crown age of Onagraceae was esti-  
260 mated to be 98.8 Ma (94.0 Ma – 107.3 Ma 95% HPD; Figure 6), and a summary of the divergence times of  
261 major clades within Onagraceae can be found in Supporting Information Table 3.

### 262 3.2 Stochastic Character Maps

263 Since the results from the analysis allowing for secondary gains of SI were essentially identical to the results  
264 from the analysis that assumed irreversibility and disallowed secondary gains of SI, we report here only the  
265 results from the irreversible analysis. See Supporting Information Section S2.3 for results of the analysis  
266 allowing for secondary gains.

267 Under the state-dependent diversification model, repeated independent losses of SI across the Onagraceae  
268 phylogeny were found to be associated with shifts in diversification rates (Figure 6). Additionally, transitions  
269 between the unobserved character states *a* and *b* were also associated with diversification rate heterogeneity.  
270 Uncertainty in the timing of diversification-rate shifts and character state transitions was generally low, but  
271 increased along long branches where there was relatively little information regarding the exact timing of  
272 transitions (Figure 7). Following the loss of SI, there was an evolutionary time lag (mean 1.97 My) until  
273 net-diversification (speciation minus extinction) turned negative (Figure 8). Since SC hidden state *b* was

274 estimated to have positive net-diversification and SC hidden state  $a$  was estimated to have negative net-  
 275 diversification, we calculated the time lag from the loss of SI until an evolutionary decline as the time spent  
 276 following the loss of SI in hidden state  $b$  until transitioning to hidden state  $a$ . In many cases the loss of SI  
 277 occurred in an ancestral lineage with positive net-diversification (hidden state  $b$ ) followed by multiple shifts  
 278 to negative net-diversification (hidden state  $a$ ) in descendant lineages. To account for these non-independent  
 279 time lags and avoid double counting the time the ancestral lineage spent in SC state  $b$ , we average over all  
 280 (partially) dependent events. For example, the ancestral lineage spent time  $t_a$  in state  $b$  and the left and  
 281 right descendant lineages spent time  $t_l$  and  $t_r$  in state  $b$  before switching to state  $a$  respectively. Then, we  
 282 counted the time as  $t = t_a + \frac{t_l + t_r}{2}$ .

### 283 3.3 Diversification Rate Estimates

284 Within either hidden state ( $a$  or  $b$ ) SC lineages had generally higher speciation and extinction rates compared  
 285 to SI lineages (Table 1 and Figure 6). Despite higher speciation and extinction rates, SC lineages had lower  
 286 net-diversification compared to SI lineages. Net-diversification was found to be negative for most but not all  
 287 extant SC lineages.

**Table 1:** Posterior parameter estimates of the HiSSE mating system evolution model depicted in Figure 5.

| Parameter           | $X$            | Mating System       | Hidden State      | Mean  | 95% HPD Interval |
|---------------------|----------------|---------------------|-------------------|-------|------------------|
| Speciation          | $\lambda_{ca}$ | SC                  | $a$               | 0.12  | 0.02 – 0.23      |
|                     | $\lambda_{ia}$ | SI                  | $a$               | 0.16  | 0.09 – 0.24      |
|                     | $\lambda_{cb}$ | SC                  | $b$               | 1.66  | 0.98 – 2.41      |
|                     | $\lambda_{ib}$ | SI                  | $b$               | 0.65  | 0.45 – 0.85      |
| Extinction          | $\mu_{ca}$     | SC                  | $a$               | 0.35  | 0.25 – 0.48      |
|                     | $\mu_{ia}$     | SI                  | $a$               | 0.04  | 0.00 – 0.09      |
|                     | $\mu_{cb}$     | SC                  | $b$               | 1.36  | 0.65 – 2.19      |
|                     | $\mu_{ib}$     | SI                  | $b$               | 0.10  | 0.00 – 0.29      |
| Net-diversification | $r_{ca}$       | SC                  | $a$               | -0.23 | -0.32 – -0.14    |
|                     | $r_{ia}$       | SI                  | $a$               | 0.13  | 0.05 – 0.19      |
|                     | $r_{cb}$       | SC                  | $b$               | 0.30  | 0.15 – 0.46      |
|                     | $r_{ib}$       | SI                  | $b$               | 0.55  | 0.39 – 0.71      |
| Transition          | $Q_{ic}$       | SI $\rightarrow$ SC | $a/b$             | 0.22  | 0.16 – 0.28      |
|                     | $Q_{ab}$       | SI/SC               | $a \rightarrow b$ | 0.01  | 0.00 – 0.02      |
|                     | $Q_{ba}$       | SI/SC               | $b \rightarrow a$ | 0.33  | 0.16 – 0.52      |

#### 288 3.3.1 Model Comparisons, Incomplete Sampling, and Error Rates

289 For the Onagraceae dataset, the state-dependent diversification model of mating system evolution (Figure  
 290 5) was “decisively” supported over the state-independent diversification model with a Bayes factor ( $2\ln\text{BF}$ )  
 291 of 19.9 (Jeffreys 1961). Bayes factors calculated using simulated datasets showed that the false positive error

292 rate was low even despite the poor taxon sampling present in our empirical dataset (Figure 9). The false  
293 positive rate for “strong” support ( $2\ln\text{BF} > 6$ ; Kass and Raftery 1995) was 0.05, and the false positive rate  
294 for “very strong” support ( $2\ln\text{BF} > 10$ ; Kass and Raftery 1995) was 0.0.

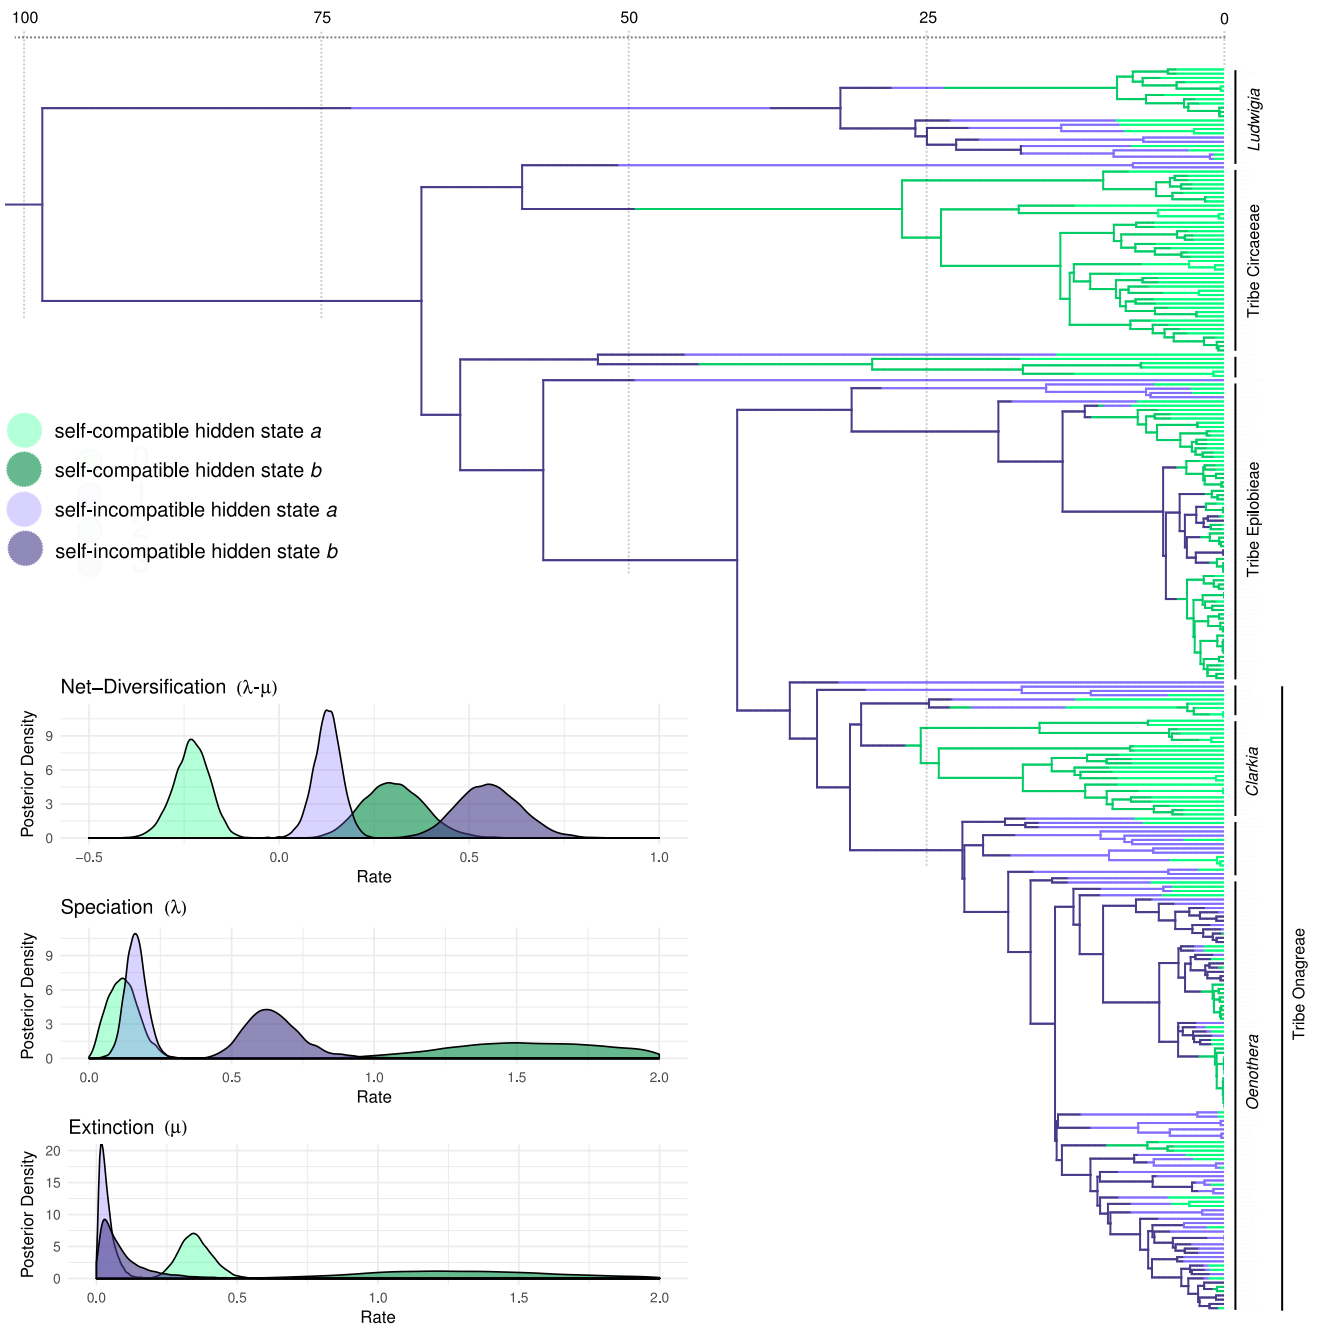

**Figure 6: Maximum a posteriori reconstruction of mating system evolution and shifts in diversification rates in Onagraceae.** Divergence times in millions of years are indicated by the axis at the top. Note that in this marginal summary reconstruction some transitions are displayed such as the loss and regain of self-incompatibility that were impossible in any single sampled character history. This indicates high uncertainty in the exact timing of transitions (see Figure 7). The inset panels show posterior densities of net-diversification ( $\lambda - \mu$ ), speciation ( $\lambda$ ), and extinction ( $\mu$ ) rates in millions of years. Changes in mating system and an unobserved character (hidden states *a* and *b*) are both associated with diversification rate heterogeneity. Within either hidden state (*a* or *b*) self-compatible lineages have higher extinction and speciation rates yet lower net-diversification rates compared to self-incompatible lineages.

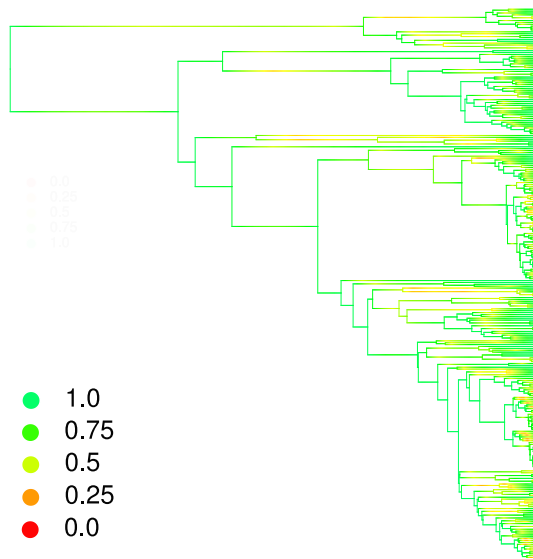

**Figure 7:** Posterior probabilities of the maximum a posteriori reconstruction of mating system evolution and shifts in diversification rates in *Onagraceae*. Marginal posterior probabilities of the character states shown in Figure 6. Uncertainty was highest along long branches where there was relatively little information regarding the timing of transitions.

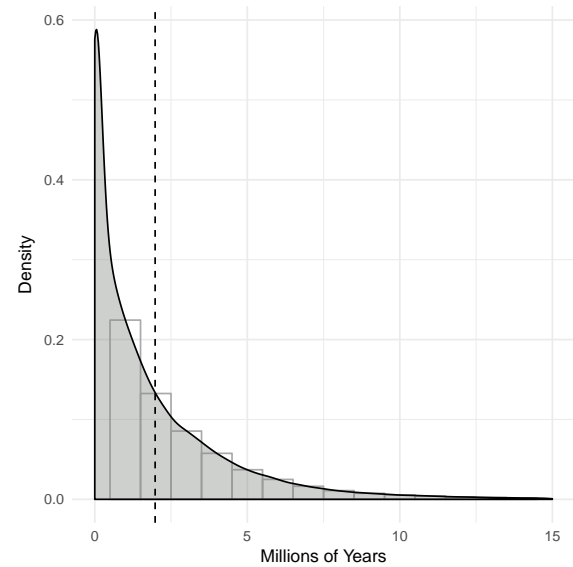

**Figure 8:** The time lag from the loss of self-incompatibility until the onset of evolutionary decline. The time in millions of years after the loss of self-incompatibility until the net-diversification rate became negative measured over 10000 stochastic character map samples. The mean time lag until evolutionary decline was 1.97 million years (indicated by a dashed line).

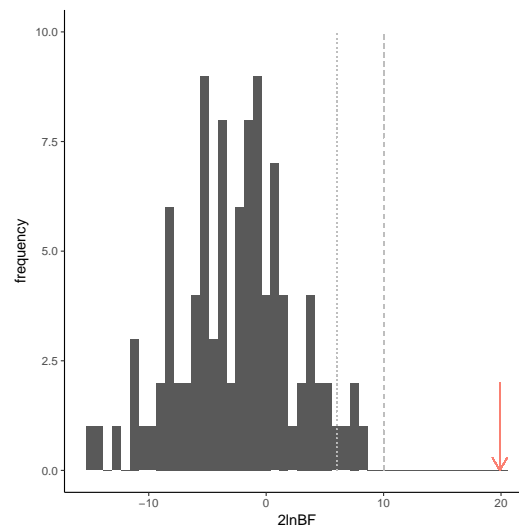

**Figure 9:** Bayes factors ( $2\ln\text{BF}$ ) comparing the fit of the state-dependent diversification model of mating system evolution with the state-independent diversification model. The red arrow indicates the “decisive” support found for the empirical *Onagraceae* data ( $2\ln\text{BF} = 19.9$ ; [Jeffreys 1961](#)). The dark grey bars represent Bayes factors calculated for 100 datasets simulated under a state-independent diversification model and pruned to have the same proportion of missing species as the empirical *Onagraceae* dataset. The dotted light grey line indicates “strong” support ( $2\ln\text{BF} > 6$ ; [Kass and Raftery 1995](#)), and the dashed light grey line indicates “very strong” support ( $2\ln\text{BF} > 10$ ; [Kass and Raftery 1995](#)). Even with the poor taxon sampling present in the *Onagraceae* dataset, our power to reject false positives was high.

## 295 4 Discussion and Conclusion

296 The stochastic character map results reveal that the loss of SI has different short term and long term  
297 macroevolutionary consequences. Lineages with relatively recent losses of SI like *Epilobium* are undergoing  
298 a burst in both speciation and extinction rates with a positive net-diversification rate. However, lineages  
299 that have long been SC such as *Fuchsia* (Tribe Circaeae) and *Clarkia* are in a previously unrecognized  
300 evolutionary decline. These lineages went through an increase in both speciation and extinction rates a long  
301 time ago —after the loss of SI— but now only the extinction rates remain elevated and the speciation rates  
302 have declined, resulting in a negative net-diversification rate. The time lag until this evolutionary decline  
303 was measured as the time spent following the loss of SI in hidden state *b* (positive net-diversification) until  
304 transitioning to hidden state *a* (negative net-diversification). By mapping the time spent in each hidden state,  
305 the stochastic character maps quantified the speed of the evolutionary decline in SC lineages. These results  
306 are robust to phylogenetic uncertainty (by averaging over a posterior distribution of trees), to assumptions  
307 of mating system irreversibility (Supporting Information for results allowing for secondary gains of SI), and  
308 to the effect of missing species sampling (false positive error rate calculated using simulations).

309 While the mean time from the loss of SI until evolutionary decline was 1.97 My, there was a large  
310 amount of variation in time estimates (Figure 8). This variation could be due to differences in the realized  
311 selfing/outcrossing rates of different SC lineages. Lineages with higher selfing rates likely build up load due  
312 to weakly deleterious mutations more quickly, leading to a more rapid mutational meltdown and eventual  
313 evolutionary decline (Lynch et al. 1995a,b; Wright et al. 2008). Furthermore, even if mutational load is  
314 low, the loss of genetic variation in highly selfing lineages will reduce the probability that such lineages can  
315 respond adequately to natural selection, such as imposed by a changing or new environment, thus increasing  
316 the potential for extinction. SC lineages with high outcrossing rates and less inbreeding, on the other hand,  
317 likely have larger effective population sizes and lower genetic load (Wright et al. 2008), thus delaying the  
318 onset of higher extinction rates. A limitation of our analysis is that our species data was coded simply SI or  
319 SC, a more nuanced exploration of the macroevolutionary impact of selfing would require hard to measure  
320 selfing/outcrossing rates from a large number of species across the phylogeny.

321 These results confirm theory about the macroevolutionary consequences of selfing (Stebbins 1957; Grant  
322 1981). These consequences include the increased probability of going extinct due to the accumulation of  
323 harmful mutations (Lynch et al. 1995a,b; Wright et al. 2008) and an increased rate of speciation which may  
324 be driven by higher among-population differentiation and reproductive assurance that facilitates colonization  
325 of new habitats (Baker 1955; Hartfield 2016). The advantages of reproductive assurance may explain why

326 transitions to SC occur repeatedly (Igic et al. 2008; Lande and Schemske 1985). However, our results  
327 reveal that this advantage in Onagraceae is short-lived; the burst of increased speciation following the loss  
328 of SI eventually declines, possibly due to failing to adapt to changing conditions and the accumulation  
329 of deleterious mutations. The overall macroevolutionary pattern is one in which SC Onagraceae lineages  
330 undergo rapid bursts of increased speciation that eventually decline, doomed by intensified extinction and  
331 thus supporting Stebbins' hypothesis of selfing as an evolutionary dead-end (Stebbins 1957). These results  
332 provide empirical evidence for the “senescing” diversification rates predicted in highly selfing lineages by Ho  
333 and Agrawal (2017), who proposed that primarily selfing lineages may at first diversify at higher rates than  
334 outcrossing lineages but over time slow down due to elevated extinction rates. Similar results were previously  
335 found in Primulaceae by de Vos et al. (2014), where SC non-heterostylous lineages were found to “live fast  
336 and die young” compared to SI heterostylous lineages.

337 Our findings corroborate previous analyses performed in the plant families Solanceae (Goldberg et al.  
338 2010), Primulaceae (de Vos et al. 2014), and Orchidaceae (Gamisch et al. 2015) where SC lineages were  
339 also found to have lower net-diversification rates than SI lineages. Our results, however, are the first to  
340 use a HiSSE model to show that this pattern is supported even when other unmeasured factors affect  
341 diversification rate heterogeneity. Intuitively, it is clear that no single factor drives all diversification rate  
342 heterogeneity in diverse and complex clades such as Onagraceae. Indeed, in some lineages of *Oenothera* the  
343 loss of sexual recombination and segregation due to extensive chromosome translocations (a condition called  
344 Permanent Translocation Heterozygosity) is associated with increased diversification rates (Johnson et al.  
345 2011). Furthermore, other factors such as polyploidy and shifts in habitat, growth form, or life cycle may  
346 impact diversification rates (Mayrose et al. 2011; Donoghue 2005; Eriksson and Bremer 1992). Interpreting  
347 the hidden states of an SSE model can be challenging (Caetano et al. 2018). Depending on the diversification  
348 rates estimated there were different but equally valid ways to make sense of the hidden states in our analysis:  
349 (1) if the diversification rates varied between SC and SI, but not between hidden states *a* and *b*, we could  
350 conclude that shifts in mating system explained all diversification rate heterogeneity; (2) if the diversification  
351 rates did not vary between SC and SI, but did vary between hidden states *a* and *b* we could conclude that  
352 there were background rate changes unassociated with mating system and that mating system evolution was  
353 not associated with rate shifts; or (3) if the diversification rates varied both between SC/SI and between  
354 hidden states *a/b*, then depending on the phylogenetic pattern of the hidden states they could represent  
355 the different long and short term consequences of the loss of SI. Our results are congruent with this last  
356 interpretation, and we interpret the phylogenetic pattern of the hidden states to represent the temporal  
357 decay of diversification rates in SC lineages. It is important to note, however, that our HiSSE-based analysis  
358 allowed for any of those three outcomes unlike BiSSE-based analyses.

359 Stochastic character mapping of state-dependent diversification, can be a powerful tool for examining  
360 the timing and nature of both shifts in diversification rates and character state transitions on a phylogeny.  
361 Character mapping reveals which stages of the unobserved character a lineage goes through; e.g. after the  
362 loss of self-incompatibility transitions are predominantly from hidden state  $b$  to  $a$ , representing shifts from  
363 positive net-diversification to negative net-diversification. Furthermore, character mapping infers the state  
364 of the lineages in the present and so reveals which tips of the phylogeny are currently undergoing positive  
365 or negative net-diversification. If stochastic character mapping is used with an SSE model in which some  
366 or even all states are hidden (no observed states), then our method will “paint” the location of shifts in  
367 diversification rate regimes over the tree. Distributions of character map samples could be used for posterior  
368 predictive assessments of model fit (Nielsen 2002; Bollback 2006; Höhna et al. 2018) and for testing whether  
369 multiple characters coevolve (Huelsenbeck et al. 2003; Bollback 2006). Our hope is that these approaches  
370 enable researchers to examine the macroevolutionary impacts of the diverse processes shaping the tree of life  
371 with increasing quantitative rigor.

## 372 5 Acknowledgements

373 Thank you to Bruce Baldwin, John Huelsenbeck, Emma Goldberg, Michael Landis, Seema Sheth, and Carl  
374 Rothfels and his lab group for discussions that have improved our work. W.A.F. was supported by grants  
375 from the National Science Foundation (GRFP DGE 1106400, DDIG DEB 1601402, and DEB 1655478). Com-  
376 putations were performed on the Savio computational cluster provided by the Berkeley Research Computing  
377 program at the University of California, Berkeley.

## 378 References

- 379 Baker, H. G. 1955. Self-compatibility and establishment after ‘long-distance’ dispersal. *Evolution* 9:347–349.
- 380 Barrett, S. C. 2002. The evolution of plant sexual diversity. *Nature Reviews Genetics* 3:274–284.
- 381 Beaulieu, J. M. and B. C. O’Meara. 2016. Detecting hidden diversification shifts in models of trait-dependent  
382 speciation and extinction. *Systematic Biology* 65:583–601.
- 383 Bollback, J. P. 2006. Simmap: stochastic character mapping of discrete traits on phylogenies. *BMC Bioin-*  
384 *formatics* 7:88.
- 385 Caetano, D., B. O’Meara, and J. Beaulieu. 2018. Hidden state models improve the adequacy of state-  
386 dependent diversification approaches using empirical trees, including biogeographical models. *bioRxiv* .



- 387 Darwin, C. 1876. The effects of cross and self fertilization in the vegetable kingdom.
- 388 de Vos, J. M., C. E. Hughes, G. M. Schneeweiss, B. R. Moore, and E. Conti. 2014. Heterostyly accelerates  
389 diversification via reduced extinction in primroses. *Proceedings of the Royal Society B* 281:20140075.
- 390 Donoghue, M. J. 2005. Key innovations, convergence, and success: macroevolutionary lessons from plant  
391 phylogeny. *Paleobiology* 31:77–93.
- 392 Eriksson, O. and B. Bremer. 1992. Pollination systems, dispersal modes, life forms, and diversification rates  
393 in angiosperm families. *Evolution* 46:258–266.
- 394 Felsenstein, J. 1981. Evolutionary trees from DNA sequences: a maximum likelihood approach. *Journal of*  
395 *Molecular Evolution* 17:368–376.
- 396 Ferrer, M. M. and S. V. Good. 2012. Self-sterility in flowering plants: preventing self-fertilization increases  
397 family diversification rates. *Annals of Botany* Page mcs124.
- 398 FitzJohn, R., W. Maddison, and S. Otto. 2009. Estimating trait-dependent speciation and extinction rates  
399 from incompletely resolved phylogenies 58:595–611.
- 400 FitzJohn, R. G. 2010. Quantitative traits and diversification 59:619–633.
- 401 FitzJohn, R. G. 2012. Diversitree: comparative phylogenetic analyses of diversification in R. *Methods in*  
402 *Ecology and Evolution* 3:1084–1092.
- 403 Franklin, F., M. Lawrence, and V. Franklin-Tong. 1995. Cell and molecular biology of self-incompatibility in  
404 flowering plants. Pages 1–64 *in* *International Review of Cytology* vol. 158. Elsevier.
- 405 Freyman, W. A. 2015. SUMAC: Constructing phylogenetic supermatrices and assessing partially decisive  
406 taxon coverage. *Evolutionary Bioinformatics* 11:263.
- 407 Freyman, W. A. and S. Höhna. 2018. Cladogenetic and anagenetic models of chromosome number evolution:  
408 a Bayesian model averaging approach. *Systematic Biology* 67:195–215.
- 409 Gamisch, A., G. A. Fischer, and H. P. Comes. 2015. Multiple independent origins of auto-pollination in  
410 tropical orchids (*bulbophyllum*) in light of the hypothesis of selfing as an evolutionary dead end. *BMC*  
411 *Evolutionary Biology* 15:192.
- 412 Goldberg, E. E. and B. Igić. 2012. Tempo and mode in plant breeding system evolution. *Evolution* 66:3701–  
413 3709.

- 414 Goldberg, E. E., J. R. Kohn, R. Lande, K. A. Robertson, S. A. Smith, and B. Igić. 2010. Species selection  
415 maintains self-incompatibility. *Science* 330:493–495.
- 416 Goldberg, E. E., L. T. Lancaster, and R. H. Ree. 2011. Phylogenetic inference of reciprocal effects between  
417 geographic range evolution and diversification. *Systematic Biology* 60:451–465.
- 418 Grant, V. 1981. *Plant speciation*. New York: Columbia University Press xii, 563p.-illus., maps, chrom. nos..  
419 En 2nd edition. Maps, Chromosome numbers. General (KR, 198300748).
- 420 Hartfield, M. 2016. Evolutionary genetic consequences of facultative sex and outcrossing. *Journal of Evolu-*  
421 *tionary Biology* 29:5–22.
- 422 Hastings, W. K. 1970. Monte carlo sampling methods using markov chains and their applications. *Biometrika*  
423 57:97–109.
- 424 Heslop-Harrison, Y. 1990. Stigma form and surface in relation to self-incompatibility in the Onagraceae.  
425 *Nordic Journal of Botany* 10:1–19.
- 426 Ho, E. K. and A. F. Agrawal. 2017. Aging asexual lineages and the evolutionary maintenance of sex. *Evolution*  
427 .
- 428 Hobolth, A. and E. A. Stone. 2009. Efficient simulation from finite-state, continuous-time Markov chains  
429 with incomplete observations. *Annals of Applied Statistics* 3:1204–1231.
- 430 Höhna, S. 2014. Likelihood inference of non-constant diversification rates with incomplete taxon sampling  
431 9:e84184.
- 432 Höhna, S., L. M. Coghill, G. G. Mount, R. C. Thomson, and J. M. Brown. 2018.  $P^3$ : Phylogenetic posterior  
433 prediction in RevBayes. *Molecular Biology and Evolution* 35:1028–1034.
- 434 Höhna, S., T. A. Heath, B. Boussau, M. J. Landis, F. Ronquist, and J. P. Huelsenbeck. 2014. Probabilistic  
435 Graphical Model Representation in Phylogenetics. *Systematic biology* 63:753–771.
- 436 Höhna, S., M. J. Landis, T. A. Heath, B. Boussau, N. Lartillot, B. R. Moore, J. P. Huelsenbeck, and  
437 F. Ronquist. 2016. RevBayes: Bayesian phylogenetic inference using graphical models and an interactive  
438 model-specification language. *Systematic Biology* 65:726–736.
- 439 Höhna, S., M. L. Landis, and J. P. Huelsenbeck. 2017. Parallel power posterior analyses for fast computation  
440 of marginal likelihoods in phylogenetics. *bioRxiv* .

- 441 Höhna, S., T. Stadler, F. Ronquist, and T. Britton. 2011. Inferring speciation and extinction rates under  
442 different species sampling schemes 28:2577–2589.
- 443 Huelsenbeck, J. P., R. Nielsen, and J. P. Bollback. 2003. Stochastic mapping of morphological characters.  
444 *Systematic Biology* 52:131–158.
- 445 Igc, B., R. Lande, and J. R. Kohn. 2008. Loss of self-incompatibility and its evolutionary consequences.  
446 *International Journal of Plant Sciences* 169:93–104.
- 447 Irvahn, J. and V. N. Minin. 2014. Phylogenetic stochastic mapping without matrix exponentiation. *Journal*  
448 *of Computational Biology* 21:676–690.
- 449 Jeffreys, H. 1961. *Theory of probability*. 3 ed. Oxford University Press.
- 450 Johnson, M. T., R. G. FitzJohn, S. D. Smith, M. D. Rausher, and S. P. Otto. 2011. Loss of sexual re-  
451 combination and segregation is associated with increased diversification in evening primroses. *Evolution*  
452 65:3230–3240.
- 453 Kass, R. E. and A. E. Raftery. 1995. Bayes factors. *Journal of the American Statistical Association* 90:773–  
454 795.
- 455 Lande, R. and D. W. Schemske. 1985. The evolution of self-fertilization and inbreeding depression in plants.  
456 I. Genetic models. *Evolution* 39:24–40.
- 457 Landis, M. J., W. A. Freyman, and B. G. Baldwin. 2018. Retracing the Hawaiian silversword radiation  
458 despite phylogenetic, biogeographic, and paleogeographic uncertainty. bioRxiv Page 301887.
- 459 Lewis, H. and M. E. Lewis. 1955. The genus *Clarkia*. *University of California Publications in Botany* 20:241–  
460 392.
- 461 Lynch, M., J. Conery, and R. Burger. 1995a. Mutation accumulation and the extinction of small populations.  
462 *The American Naturalist* 146:489–518.
- 463 Lynch, M., J. Conery, and R. Burger. 1995b. Mutational meltdowns in sexual populations. *Evolution*  
464 Pages 1067–1080.
- 465 Maddison, W. P. and R. G. FitzJohn. 2015. The unsolved challenge to phylogenetic correlation tests for  
466 categorical characters. *Systematic Biology* 64:127–136.
- 467 Maddison, W. P., P. E. Midford, and S. P. Otto. 2007. Estimating a binary character's effect on speciation  
468 and extinction. *Systematic Biology* 56:701–710.

- 469 Magnuson-Ford, K. and S. P. Otto. 2012. Linking the investigations of character evolution and species  
470 diversification. *The American Naturalist* 180:225–245.
- 471 Mayrose, I., S. H. Zhan, C. J. Rothfels, K. Magnuson-Ford, M. S. Barker, L. H. Rieseberg, and S. P. Otto.  
472 2011. Recently formed polyploid plants diversify at lower rates. *Science* 333:1257–1257.
- 473 Metropolis, N., A. W. Rosenbluth, M. N. Rosenbluth, A. H. Teller, and E. Teller. 1953. Equation of state  
474 calculations by fast computing machines. *The Journal of Chemical Physics* 21:1087–1092.
- 475 Nee, S., R. M. May, and P. H. Harvey. 1994. The reconstructed evolutionary process. *Philosophical Trans-*  
476 *actions: Biological Sciences* 344:305–311.
- 477 Ng, J. and S. D. Smith. 2014. How traits shape trees: new approaches for detecting character state-dependent  
478 lineage diversification. *Journal of Evolutionary Biology* 27:2035–2045.
- 479 Nielsen, R. 2002. Mapping mutations on phylogenies. *Systematic Biology* 51:729–739.
- 480 Niu, S.-C., J. Huang, Y.-Q. Zhang, P.-X. Li, G.-Q. Zhang, Q. Xu, L.-J. Chen, J.-Y. Wang, Y.-B. Luo, and  
481 Z.-J. Liu. 2017. Lack of S-RNase-based gametophytic self-incompatibility in orchids suggests that this  
482 system evolved after the monocot-eudicot split. *Frontiers in Plant Science* 8:1106.
- 483 Plitmann, U., P. H. Raven, and D. E. Breedlove. 1973. The systematics of *Lopezieae* (Onagraceae). *Annals*  
484 *of the Missouri Botanical Garden* 60:478–563.
- 485 Rabosky, D. L. and E. E. Goldberg. 2015. Model inadequacy and mistaken inferences of trait-dependent  
486 speciation. *Systematic Biology* 64:340–355.
- 487 Ramanauskas, K. and B. Igić. 2017. The evolutionary history of plant T2/S-type ribonucleases. *PeerJ*  
488 5:e3790.
- 489 Raven, P. H. 1979. A survey of reproductive biology in Onagraceae. *New Zealand Journal of Botany* 17:575–  
490 593.
- 491 Rodrigue, N., H. Philippe, and N. Lartillot. 2008. Uniformization for sampling realizations of Markov pro-  
492 cesses: applications to Bayesian implementations of codon substitution models. *Bioinformatics* 24:56–62.
- 493 Sanderson, M. J. and M. J. Donoghue. 1996. Reconstructing shifts in diversification rates on phylogenetic  
494 trees. *Trends in Ecology & Evolution* 11:15–20.
- 495 Seavey, S. R., P. Wright, and P. H. Raven. 1977. A comparison of *Epilobium minutum* and *E. foliosum*  
496 (*Onagraceae*). *Madroño* 24:6–12.

- 497 Stebbins, G. L. 1957. Self fertilization and population variability in the higher plants. *The American Natu-*  
498 *ralist* 91:337–354.
- 499 Stebbins, G. L. 1974. Flowering plants: evolution above the species level.
- 500 Steinbachs, J. and K. Holsinger. 2002. S-rnase-mediated gametophytic self-incompatibility is ancestral in  
501 eudicots. *Molecular Biology and Evolution* 19:825–829.
- 502 Sytsma, K., A. Litt, and M. Zjhra. 2004. Clades, clocks, and continents: Historical and biogeographical anal-  
503 ysis of Myrtaceae, Vochysiaceae, and relatives in the southern Hemisphere source. *International Journal*  
504 *of Plant Sciences* 165:S85–S105.
- 505 Szathmary, E. and J. M. Smith. 1995. The major evolutionary transitions. *Nature* 374:227.
- 506 Van Dyk, D. A. and X.-L. Meng. 2001. The art of data augmentation. *Journal of Computational and*  
507 *Graphical Statistics* 10:1–50.
- 508 Vieira, J., N. A. Fonseca, and C. P. Vieira. 2008. An S-RNase-based gametophytic self-incompatibility system  
509 evolved only once in eudicots. *Journal of Molecular Evolution* 67:179–190.
- 510 Wagner, W. L., P. C. Hoch, and P. H. Raven. 2007. Revised classification of the Onagraceae. *Systematic*  
511 *Botany Monographs* 83.
- 512 Wright, S. I., R. W. Ness, J. P. Foxe, and S. C. Barrett. 2008. Genomic consequences of outcrossing and  
513 selfing in plants. *International Journal of Plant Sciences* 169:105–118.
- 514 Xie, W., P. O. Lewis, Y. Fan, L. Kuo, and M.-H. Chen. 2010. Improving marginal likelihood estimation for  
515 Bayesian phylogenetic model selection. *Systematic Biology* 60:150–160.
- 516 Yang, Z. and B. Rannala. 1997. Bayesian phylogenetic inference using DNA sequences: a Markov chain  
517 Monte Carlo Method 14:717–724.

# Supporting Information: Stochastic character mapping of state-dependent diversification reveals the tempo of evolutionary decline in self-compatible Onagraceae lineages

WILLIAM A. FREYMAN<sup>1</sup> AND SEBASTIAN HÖHNA<sup>2</sup>

<sup>1</sup>*Department of Integrative Biology, University of California, Berkeley, CA, 94720, USA;*

<sup>2</sup>*Division of Evolutionary Biology, Ludwig-Maximilians-Universität München, Germany*

**Corresponding author:** William A. Freyman; E-mail: willfreyman@gmail.com

## S1 Onagraceae Phylogenetic Analyses

### S1.1 Methods

#### S1.1.1 Supermatrix Assembly

DNA sequences for Onagraceae and Lythraceae were mined from GenBank using SUMAC (Freyman 2015). Lythraceae was selected as an outgroup since previous molecular phylogenetic analyses place it sister to Onagraceae (Sytsma et al. 2004). SUMAC assembled an 8 gene supermatrix (7 chloroplast loci plus the nuclear ribosomal internal transcribed spacer region) representing a total of 340 taxa. Table S1 summarizes the genes used, their length, and the percent of missing data. We counted N's in the downloaded sequences as missing data, but we did not count gaps introduced by the alignment algorithm as missing data. Sequences were aligned using MAFFT v7.123b (Katoh and Standley 2013). The default settings in MAFFT were used except that proper sequence polarity was ensured by using the direction adjustment option. Alignments were then concatenated resulting in chimeric operational taxonomic units (OTUs) that do not necessarily represent a single individual.

**Table S1:** DNA regions mined from GenBank. A total of 340 taxa were included.

| DNA Region | # Taxa | Aligned Length | # Variable Sites | Missing data (%) | Taxon Coverage Density |
|------------|--------|----------------|------------------|------------------|------------------------|
| ITS        | 250    | 904            | 481              | 26.5             | 0.735                  |
| matK       | 42     | 895            | 276              | 87.6             | 0.124                  |
| ndhF       | 39     | 1085           | 429              | 88.5             | 0.115                  |
| pgiC       | 66     | 7664           | 3828             | 80.6             | 0.194                  |
| rbcL       | 108    | 1427           | 388              | 68.2             | 0.318                  |
| rpl16      | 54     | 1139           | 343              | 84.1             | 0.159                  |
| rps16      | 78     | 1056           | 335              | 77.1             | 0.229                  |
| trnL-trnF  | 261    | 1434           | 644              | 23.2             | 0.768                  |

**Table S2:** Fossil and secondary calibrations used as priors in the Bayesian divergence time analysis. Units are in millions of years.

| Group                                  | Calibration Type | Placement | Prior Distribution | Mean | SD | Offset | Reference              |
|----------------------------------------|------------------|-----------|--------------------|------|----|--------|------------------------|
| <i>Circaea</i>                         | fossil           | stem      | lognormal          | 10   | 2  | 12     | (Grímsson et al. 2012) |
| Tribe Epilobieae                       | fossil           | stem      | lognormal          | 10   | 2  | 12     | (Grímsson et al. 2012) |
| <i>Fuchsia</i> section <i>Skinnera</i> | fossil           | stem      | lognormal          | 10   | 2  | 23     | (Lee et al. 2013)      |
| Lythraceae                             | fossil           | crown     | lognormal          | 20   | 2  | 81.5   | (Graham 2013)          |
| <i>Ludwigia</i>                        | fossil           | stem      | lognormal          | 10   | 2  | 57.6   | (Zhi-Chen et al. 2004) |
| Onagraceae + Lythraceae                | secondary        | crown     | normal             | 93   | 5  | 0      | (Sytsma et al. 2004)   |

### S1.1.2 Phylogenetic Analyses

Divergence times and phylogeny were jointly estimated using RevBayes (Höhna et al. 2014, 2016). Estimates were time calibrated using six node calibrations: four stem fossil calibrations, one crown fossil calibration, and a secondary calibration for the root split between Onagraceae and Lythraceae (Table S2). An uncorrelated lognormal relaxed clock model was used, and each of the eight gene partitions were assigned independent GTR substitution models (Tavaré 1986; Rodriguez et al. 1990). Rate variation across sites was modeled under a gamma distribution approximated by four discrete rate categories (Yang 1994). The constant rate birth-death-sampling tree prior (Nee et al. 1994; Yang and Rannala 1997) was used with the probability of sampling species at the present ( $\rho$ ) set to 0.27.  $\rho$  was calculated by dividing the number of extant species sampled in the supermatrix (340) by the sum of the number of species recognized in Onagraceae (~650) and in Lythraceae (~620).

Four independent MCMC analyses were performed. Each MCMC ran for 15000 generations, where each generation consisted of 837 randomly scheduled Metropolis-Hastings moves. This resulted in four chains that each performed a total of 12,555,000 MCMC steps. Samples of the posterior distribution were drawn every 10 generations, and the first 50% of samples from each chain were discarded as burnin resulting in 750 trees sampled from each of the 4 independent chains. Convergence was assessed by ensuring the effective sample size of each parameter was over 200 for each independent chain. The maximum a posteriori (MAP) tree was then calculated from the combined 3000 tree samples of all 4 chains.

## S1.2 Results

All Onagraceae genera described in Wagner et al. (2007) were recovered as monophyletic in the MAP summary tree with posterior probabilities > 0.95 (Figure S4). Onagraceae was found to diverge from Lythraceae at 111.3 My (95% HPD interval 106.0 - 116.6 My). Divergence time estimates of other major clades and 95% HPD intervals can be seen in Table S3.

**Table S3:** Divergence time estimates of major clades.

| Clade                   | Age Type | Mean Age (Ma) | 95% HPD Min | 95% HPD Max |
|-------------------------|----------|---------------|-------------|-------------|
| Onagraceae + Lythraceae | crown    | 111.3         | 106.0       | 116.6       |
| Onagraceae              | crown    | 98.8          | 94.0        | 107.3       |
| <i>Ludwigia</i>         | crown    | 32.1          | 31.3        | 50.6        |
| Tribe Circaeae          | stem     | 58.7          | 42.3        | 65.0        |
| Tribe Circaeae          | crown    | 27.0          | 24.6        | 29.8        |
| <i>Fuchshia</i>         | crown    | 23.7          | 23.0        | 24.1        |
| <i>Lopezia</i>          | crown    | 29.5          | 25.3        | 36.7        |
| Tribe Epilobieae        | stem     | 40.8          | 39.3        | 47.0        |
| Tribe Epilobieae        | crown    | 31.2          | 31.2        | 40.6        |
| <i>Chamerion</i>        | crown    | 14.9          | 12.6        | 25.2        |
| <i>Epilobium</i>        | crown    | 18.9          | 15.7        | 22.9        |
| Tribe Onagreae          | stem     | 40.8          | 39.3        | 47.0        |
| Tribe Onagreae          | crown    | 36.4          | 31.6        | 40.5        |
| <i>Taraxia</i>          | crown    | 17.0          | 9.9         | 19.5        |
| <i>Gayophytum</i>       | crown    | 3.1           | 1.8         | 6.1         |
| <i>Clarkia</i>          | crown    | 25.4          | 24.6        | 31.2        |
| <i>Eremothera</i>       | crown    | 10.4          | 8.1         | 15.1        |
| <i>Camissonia</i>       | crown    | 9.7           | 6.4         | 14.6        |
| <i>Eulobus</i>          | crown    | 4.7           | 2.6         | 8.1         |
| <i>Chylismia</i>        | crown    | 14.4          | 10.8        | 19.0        |
| <i>Oenothera</i>        | crown    | 14.2          | 13.0        | 17.6        |

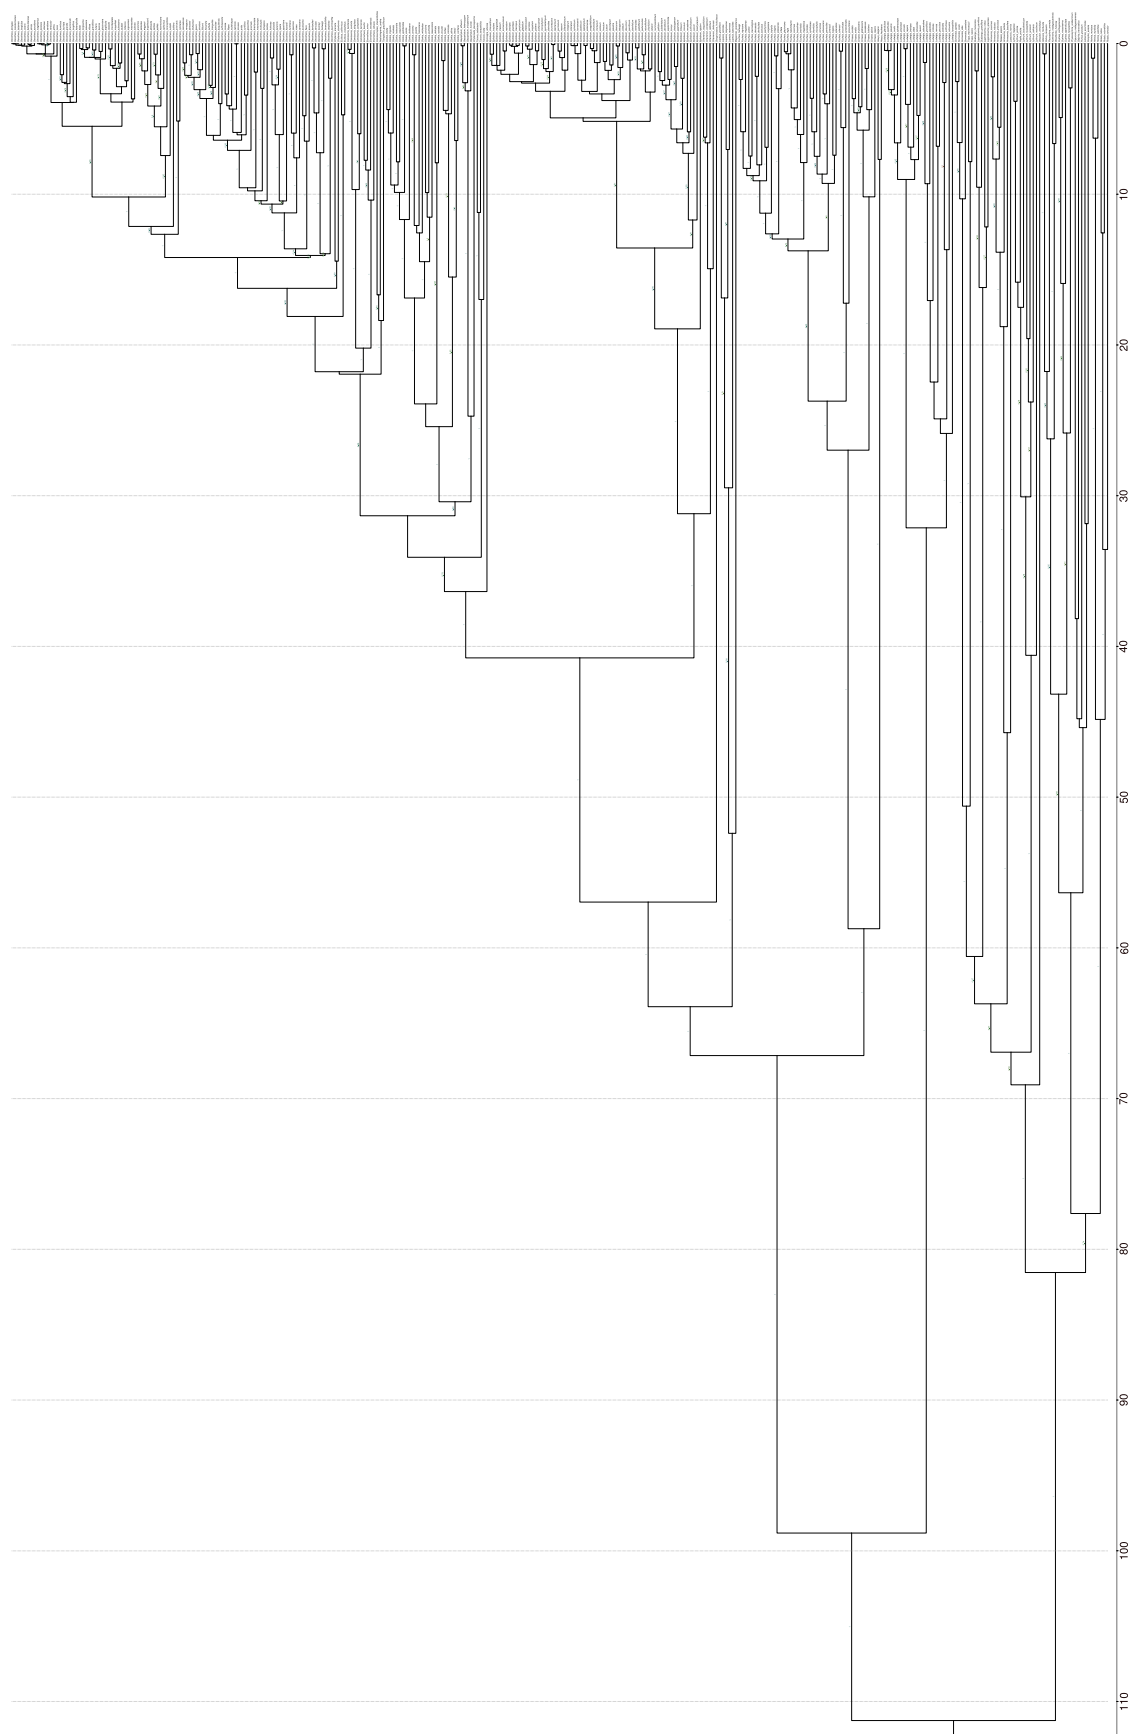

**Figure S1: Maximum a posteriori estimate of phylogeny and divergence times of Onagraceae.** Divergence times in millions of years are indicated by the axis at the bottom. Posterior probabilities  $> 0.50$  are labeled on the branches.



## S2 Mating System Evolution Analyses

### S2.1 Model Priors

Model parameter priors are listed in Table S4. The rate of loss of self-incompatibility ( $q_{ic}$ ), and the rates of switching between hidden states  $a$  and  $b$  ( $q_{ab}$  and  $q_{ba}$ ) were each given an exponential distribution with a mean of  $n/\Psi_l$ , where  $\Psi_l$  is the length of the tree  $\Psi$  and  $n$  is the expected number of transitions.  $n$  was given an exponential hyperprior with a mean of 20.

The speciation and extinction rates were drawn from exponential priors with a mean equal to an estimate of the net diversification rate  $\hat{d}$ . Under a constant rate birth-death process not conditioning on survival of the process, the expected number of lineages at time  $t$  is given by:

$$E(N_t) = N_0 e^{td}, \quad (\text{S1})$$

where  $N_0$  is the number of lineages at time 0 and  $d$  is the net diversification rate  $\lambda - \mu$  (Nee et al. 1994; Höhna 2015). Therefore, we estimate  $\hat{d}$  as:

$$\hat{d} = (\ln N_t - \ln N_0)/t, \quad (\text{S2})$$

where  $N_t$  is the number of lineages in the clade that survived to the present,  $t$  is the age of the root, and  $N_0 = 2$ . The root state probabilities  $\pi$  were set to start the process equally in either self-incompatible hidden state  $a$  or self-incompatible hidden state  $b$ .

**Table S4: Model parameter names and prior distributions.** See the main text for complete description of model parameters and prior distributions.  $\Psi_l$  represents the length of tree  $\Psi$  and  $\hat{d}$  is the expected diversification rate under a constant rate birth-death process.

| Parameter                            | $X$            | $f(X)$                               |
|--------------------------------------|----------------|--------------------------------------|
| Speciation self-incompatible $a$     | $\lambda_{ia}$ | Exponential( $\lambda = 1/\hat{d}$ ) |
| Speciation self-incompatible $b$     | $\lambda_{ib}$ | Exponential( $\lambda = 1/\hat{d}$ ) |
| Speciation self-compatible $a$       | $\lambda_{ca}$ | Exponential( $\lambda = 1/\hat{d}$ ) |
| Speciation self-compatible $b$       | $\lambda_{cb}$ | Exponential( $\lambda = 1/\hat{d}$ ) |
| Extinction self-incompatible $a$     | $\mu_{ia}$     | Exponential( $\lambda = 1/\hat{d}$ ) |
| Extinction self-incompatible $b$     | $\mu_{ib}$     | Exponential( $\lambda = 1/\hat{d}$ ) |
| Extinction self-compatible $a$       | $\mu_{ca}$     | Exponential( $\lambda = 1/\hat{d}$ ) |
| Extinction self-compatible $b$       | $\mu_{cb}$     | Exponential( $\lambda = 1/\hat{d}$ ) |
| Rate of loss of self-incompatibility | $q_{ic}$       | Exponential( $\lambda = \Psi_l/n$ )  |
| Rate of $a \rightarrow b$            | $q_{ab}$       | Exponential( $\lambda = \Psi_l/n$ )  |
| Rate of $b \rightarrow a$            | $q_{ba}$       | Exponential( $\lambda = \Psi_l/n$ )  |
| Expected number of transitions       | $n$            | Exponential( $\lambda = 1/20$ )      |

### S2.2 MCMC Analyses

To account for uncertainty in phylogeny and divergence times 200 independent MCMC analyses were performed, each sampling a tree from the posterior distribution of trees generated during the phylogenetic analyses. All outgroup (Lythraceae) lineages were pruned off, leaving 292 Onagraceae species. The probability of sampling species at the present ( $\rho$ ) was set to  $292/650 = 0.45$ , which is the number of Onagraceae species sampled divided by the approximate number of species in Onagraceae. Each MCMC run drew 10000 samples from the posterior distribution, with 190 randomly scheduled Metropolis-Hastings moves per sample. The first 10% of samples from each run were discarded as burnin. For each run, all parameters had effective sample sizes greater than 200, and the mean effective sample size of the posterior across all 200 tree samples was 1161.6. Estimates of the diversification rates were made by combining samples from all 200 independent runs.

## S2.3 Mating System Analysis Allowing for Reversals

To test for secondary gains of self-incompatibility, we repeated the analysis described above but instead of fixing  $q_{ci} = 0$  we estimated both  $q_{ci}$  and  $q_{ic}$ . Like  $q_{ic}$ , we assigned  $q_{ci}$  an exponential prior with  $\lambda = \Psi_i/r$ , where the expected number of reversals  $r$  was exponentially distributed with parameter  $\lambda = 1/20$ .

The results from the analysis allowing for secondary reversals were nearly identical to the results from the analysis disallowing secondary reversals (Figure S2 and S3). The transition rate from SI to SC was 0.19 (0.10 – 0.26 95% HPD), slightly lower than when reversals were disallowed. The rate of secondary reversals SC to SI was  $2.52 \times 10^{-3}$  ( $1.94 \times 10^{-5} - 5.88 \times 10^{-3}$  95% HPD), essentially zero. This resulted in sampled character histories nearly identical to those shown in the main text estimated under the irreversible model.

The diversification rates estimated when allowing for reversals were very similar to the diversification rates estimated when not allowing for reversals. Within either hidden state ( $a$  or  $b$ ) SC lineages had generally higher speciation and extinction rates compared to SI lineages (Figure S3). SC lineages in state  $a$  had a speciation rate of 0.14 (0.03 – 0.25 95% HPD) compared to 0.15 (0.08 – 0.22 95% HPD) in SI lineages in state  $a$ . For SC lineages in state  $b$  the speciation rate was 1.60 (1.00 – 2.29 95% HPD) compared to 0.61 (0.44 – 0.82 95% HPD) in SI lineages in state  $b$ . Similarly, SC lineages in state  $a$  had an extinction rate of 0.36 (0.25 – 0.48 95% HPD) compared to 0.04 (0.00 – 0.09 95% HPD) in SI lineages in state  $a$ . For SC lineages in state  $b$  the extinction rate was 1.27 (0.61 – 2.02 95% HPD) compared to 0.08 (0.00 – 0.25 95% HPD) in SI lineages in state  $b$ .

Despite higher speciation and extinction rates, SC lineages had lower net diversification compared to SI lineages. Net diversification was found to be negative for most but not all extant SC lineages. The net diversification rate for SC lineages in state  $a$  was -0.23 (-0.31 – -0.14 95% HPD), compared to 0.11 (0.04 – 0.18 95% HPD) in SI lineages in state  $a$ . For SC lineages in state  $b$  the net diversification rate was 0.33 (0.17 – 0.50 95% HPD), compared to 0.53 (0.36 – 0.70 95% HPD) in SI lineages in state  $b$ .

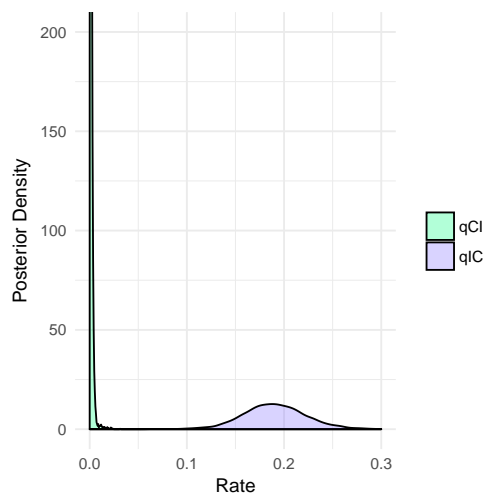

**Figure S2: Posterior density of transition rate estimates when allowing for reversals.** The estimated rate of secondary gains of SI ( $Q_{ci}$ ; green) was  $2.52 \times 10^{-3}$  ( $1.94 \times 10^{-5} - 5.88 \times 10^{-3}$  95% HPD). The estimated rate of the loss of SI ( $Q_{ic}$ ; purple) was 0.19 (0.10 – 0.26 95% HPD).

## S3 Simulations

### S3.1 Simulated Datasets

100 datasets were simulated under a model where the observed binary character was diversification rate independent yet an unobserved binary character drove background diversification rate heterogeneity. To test the effect of missing data on our power to detect state-dependent diversification, we simulated datasets with the same proportion of taxon sampling as our empirical Onagraceae dataset (45%; see details above for how

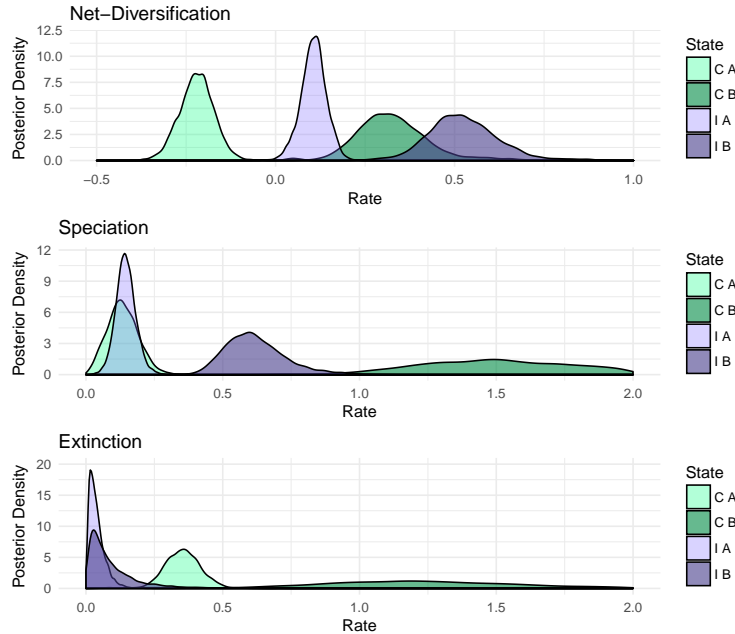

**Figure S3: Posterior density of diversification rates when allowing for reversals.** Diversification rate estimates were nearly identical to those estimated when not allowing for reversals (compare with Figure 6 in the main text).

this number was calculated). First trees were simulated under BiSSE (Maddison et al. 2007) as implemented in the R package `diversitree` (FitzJohn 2012). The binary character represented hidden states  $a$  and  $b$  with diversification rates  $\lambda_a = 1.0$ ,  $\lambda_b = 2.0$ ,  $\mu_a = 0.4$ , and  $\mu_b = 0.1$ . The rate of change between hidden states  $a$  and  $b$  was set to  $q_{ab} = q_{ba} = 0.1$ . This resulted in trees that were qualitatively similar in shape to the empirically estimated Onagraceae tree, with a mix of early diverging depauperate clades and more rapidly radiating recent clades (Figure S4). To simulate incomplete sampling, 55% of the extant tips were randomly pruned off the tree. After pruning, tree samples were discarded unless they had between 100 and 200 sampled lineages that survived to the present. This restriction ensured that the simulated datasets were not too small for reliable inference and yet not so large to be computationally infeasible. Furthermore, we discarded datasets that had fewer than 20% of the tips in either hidden state to ensure that the trees were generated under a sufficiently heterogeneous process.

Once the trees were simulated, diversification independent binary characters were simulated over the trees. These characters represented the observed character (mating system) and so were simulated under an irreversible model where the allowed transition occurred with the rate  $10/\Psi_s$ , where  $\Psi_s$  is the length of the simulated tree. This represents an expected 10 irreversible transitions over the length of the tree, and resulted in simulated datasets with a proportion of either state similar to the proportion of self-compatible/self-incompatible in the empirical Onagraceae dataset. These diversification independent characters were then used to calculate Bayes factors that compared the fit of the diversification dependent model to the diversification independent model of mating system. For details on how Bayes factors were calculated see the main text. The false positive error rate was calculated as the percent of simulation replicates in which the Bayes factor supported the false dependent model over the true independent model.

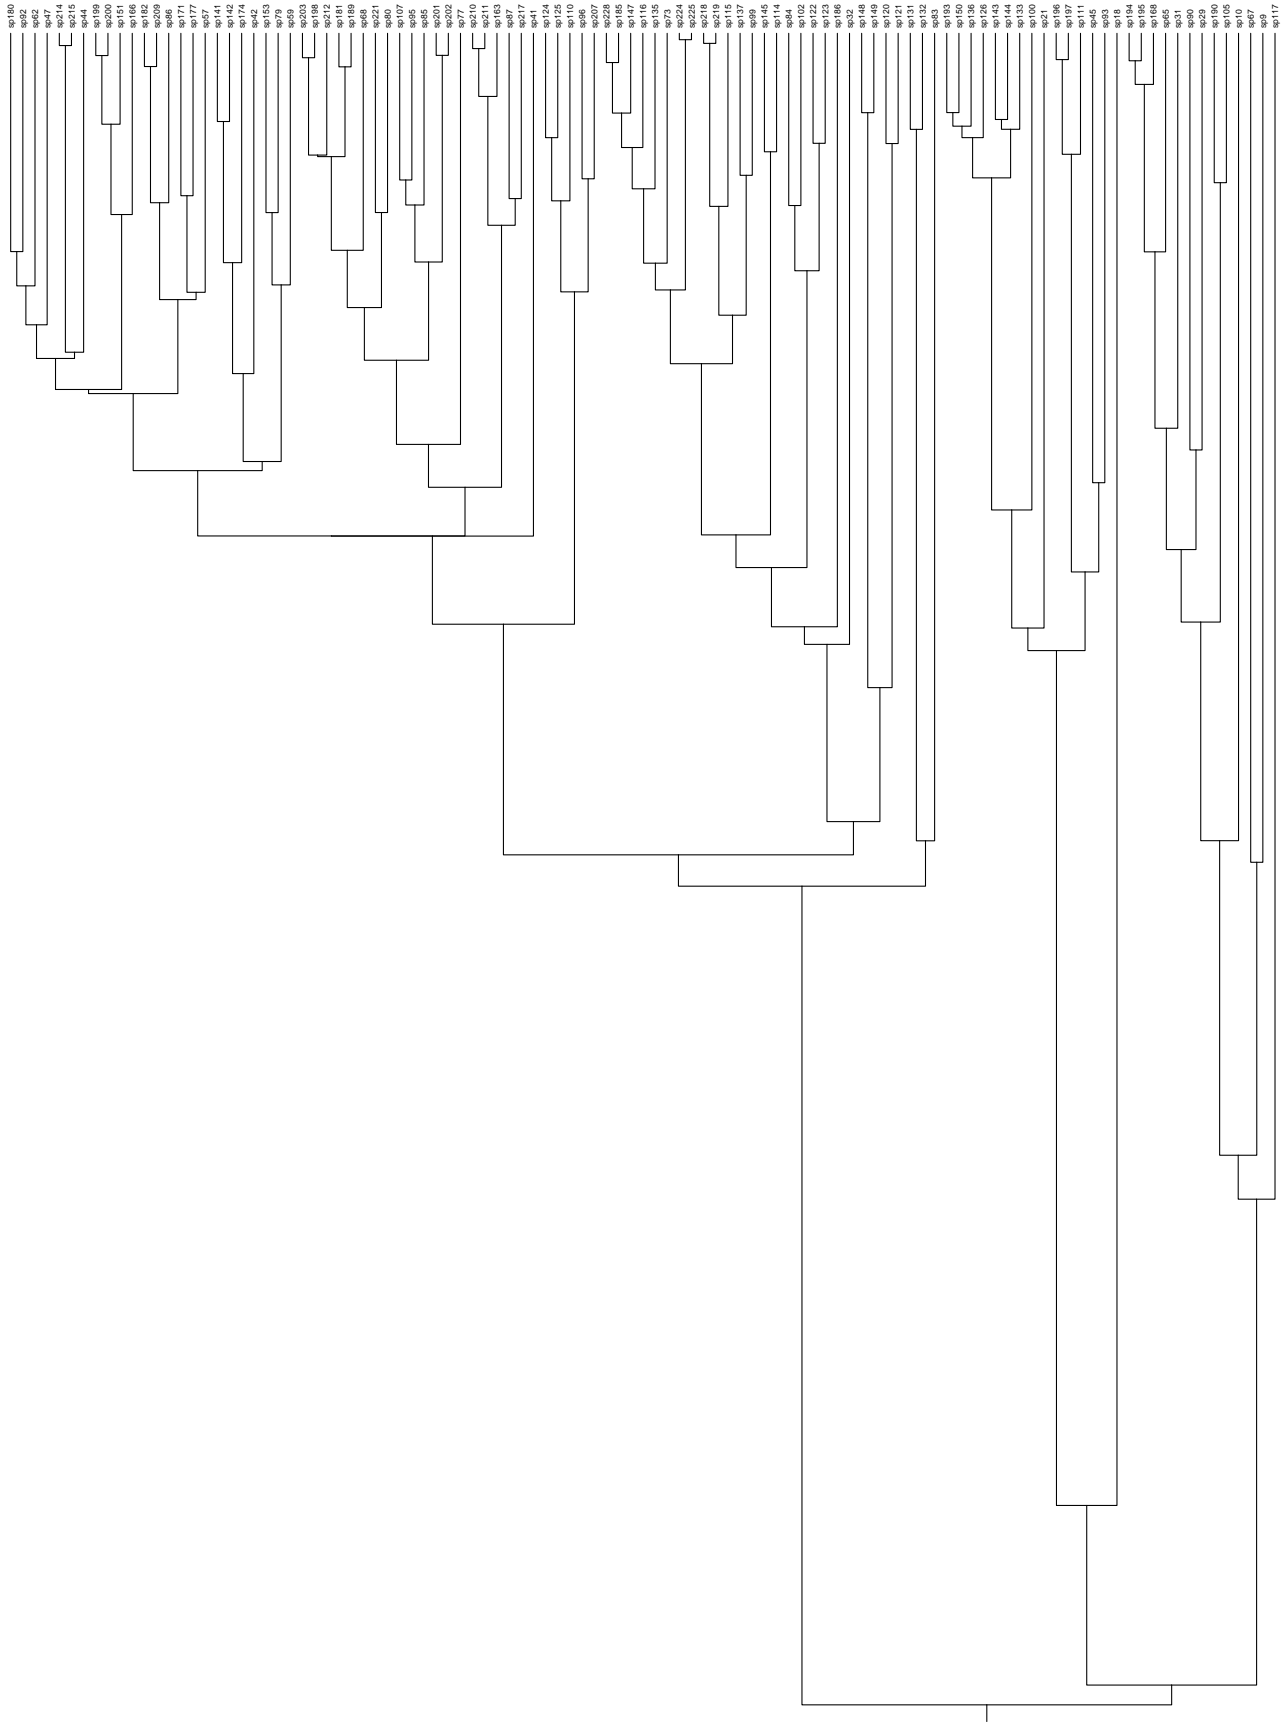

**Figure S4:** One of the trees simulated under BiSSE used to calculate the false positive error rate. Trees were simulated under a heterogeneous diversification process to result in a mix of early diverging depauperate clades and more rapidly radiating recent clades. The tree is shown after 55% of the extant lineages were randomly pruned to replicate incomplete sampling in a reconstructed phylogeny.

## References

- FitzJohn, R. G. 2012. Diversitree: comparative phylogenetic analyses of diversification in R. *Methods in Ecology and Evolution* 3:1084–1092.
- Freyman, W. A. 2015. SUMAC: Constructing phylogenetic supermatrices and assessing partially decisive taxon coverage. *Evolutionary Bioinformatics* 11:263.
- Graham, S. A. 2013. Fossil records in the Lythraceae. *The Botanical Review* 79:48–145.
- Grímsson, F., R. Zetter, and Q. Leng. 2012. Diverse fossil Onagraceae pollen from a Miocene palynoflora of north-east China: early steps in resolving the phytogeographic history of the family. *Plant Systematics and Evolution* 298:671–687.
- Höhna, S. 2015. The time-dependent reconstructed evolutionary process with a key-role for mass-extinction events. *Journal of Theoretical Biology* 380:321–331.
- Höhna, S., T. A. Heath, B. Boussau, M. J. Landis, F. Ronquist, and J. P. Huelsenbeck. 2014. Probabilistic graphical model representation in phylogenetics. *Systematic Biology* 63:753–771.
- Höhna, S., M. J. Landis, T. A. Heath, B. Boussau, N. Lartillot, B. R. Moore, J. P. Huelsenbeck, and F. Ronquist. 2016. RevBayes: Bayesian phylogenetic inference using graphical models and an interactive model-specification language. *Systematic Biology* 65:726–736.
- Katoh, K. and D. M. Standley. 2013. MAFFT multiple sequence alignment software version 7: improvements in performance and usability. *Molecular Biology and Evolution* 30:772–780.
- Lee, D. E., J. G. Conran, J. M. Bannister, U. Kaulfuss, and D. C. Mildenhall. 2013. A fossil *Fuchsia* (Onagraceae) flower and an anther mass with in situ pollen from the early Miocene of New Zealand. *American Journal of Botany* 100:2052–2065.
- Maddison, W. P., P. E. Midford, and S. P. Otto. 2007. Estimating a binary character's effect on speciation and extinction. *Systematic Biology* 56:701–710.
- Nee, S., R. M. May, and P. H. Harvey. 1994. The reconstructed evolutionary process. *Philosophical Transactions of the Royal Society B: Biological Sciences* 344:305–311.
- Rodriguez, F., J. Oliver, A. Marin, and J. R. Medina. 1990. The general stochastic model of nucleotide substitution. *Journal of Theoretical Biology* 142:485–501.
- Sytsma, K., A. Litt, and M. Zjhra. 2004. Clades, clocks, and continents: Historical and biogeographical analysis of Myrtaceae, Vochysiaceae, and relatives in the southern Hemisphere source. *International Journal of Plant Sciences* 165:S85–S105.
- Tavaré, S. 1986. Some probabilistic and statistical problems in the analysis of DNA sequences. In: *Some Mathematical Questions in Biology—DNA Sequence Analysis*, Miura RM (Ed.), American Mathematical Society, Providence (RI) 17:57–86.
- Wagner, W. L., P. C. Hoch, and P. H. Raven. 2007. Revised classification of the Onagraceae. *Systematic Botany Monographs* 83.
- Yang, Z. 1994. Maximum likelihood phylogenetic estimation from DNA sequences with variable rates over sites: approximate methods. *Journal of Molecular Evolution* 39:306–314.
- Yang, Z. and B. Rannala. 1997. Bayesian phylogenetic inference using DNA sequences: a Markov chain Monte Carlo method. *Molecular Biology and Evolution* 14:717–724.
- Zhi-Chen, S., W. Wei-Ming, and H. Fei. 2004. Fossil pollen records of extant angiosperms in China. *The Botanical Review* 70:425–458.
